# Supplementary material for: Exogenous exposures shape genetic predisposition to lipids, Alzheimer’s, and coronary heart disease in the MLXIPL gene locus
Source: publisher site journal article supplement (doi:10.18632/aging.204665), 2023-04-18
Supplement: Supplementary file [file aging-v15i9-204665-supplementary-material-SD2.pdf]

SUPPLEMENTARY FIGURES

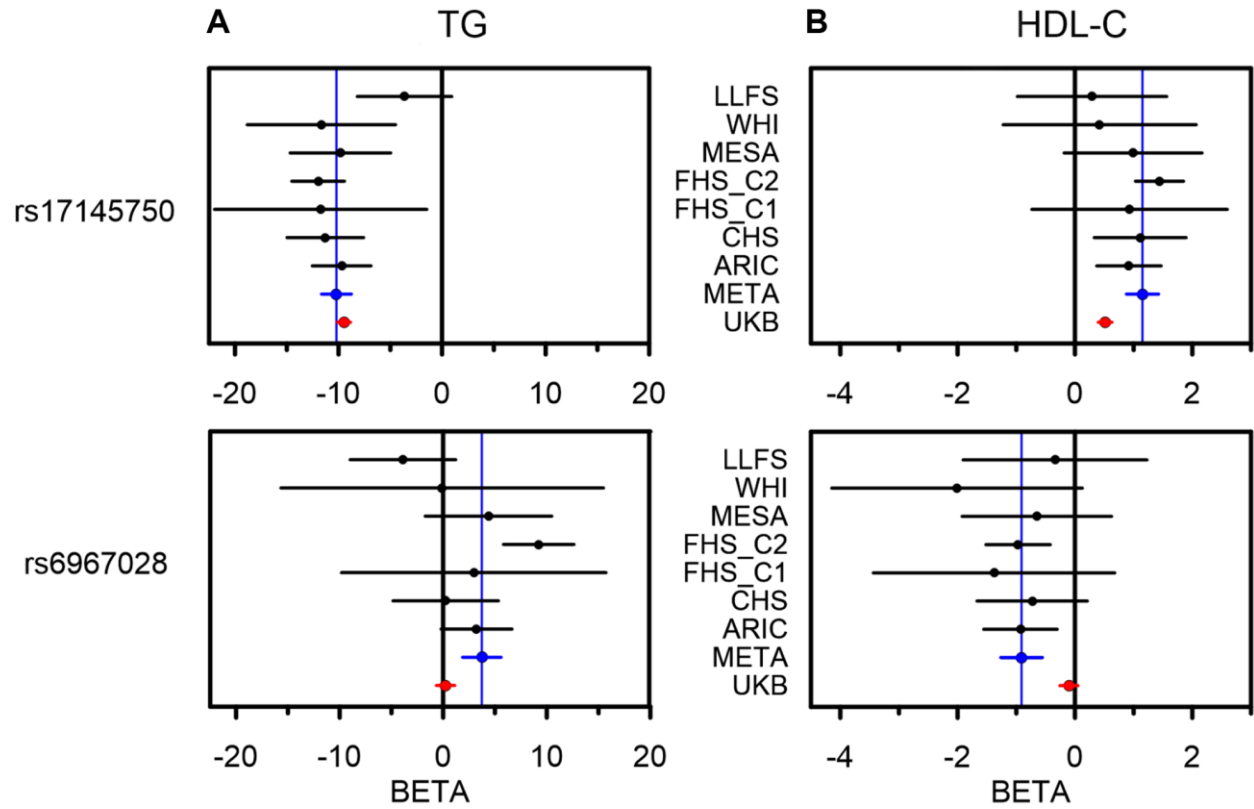

**Supplementary Figure 1. Associations of rs17145750 and rs6967028 from the MLXIPL gene locus with TG and HDL-C in each cohort separately.** The results are presented for cohorts included in the meta-analysis (black dots), the meta-analysis itself (META, blue dots), and UKB (red dots) for comparison. The X-axis shows the effect sizes beta of the associations with the outcomes: **(A)** TG and **(B)** HDL-C. The horizontal lines indicate 95% confidence intervals. Blue vertical lines represent the effect sizes in the US meta-analysis.

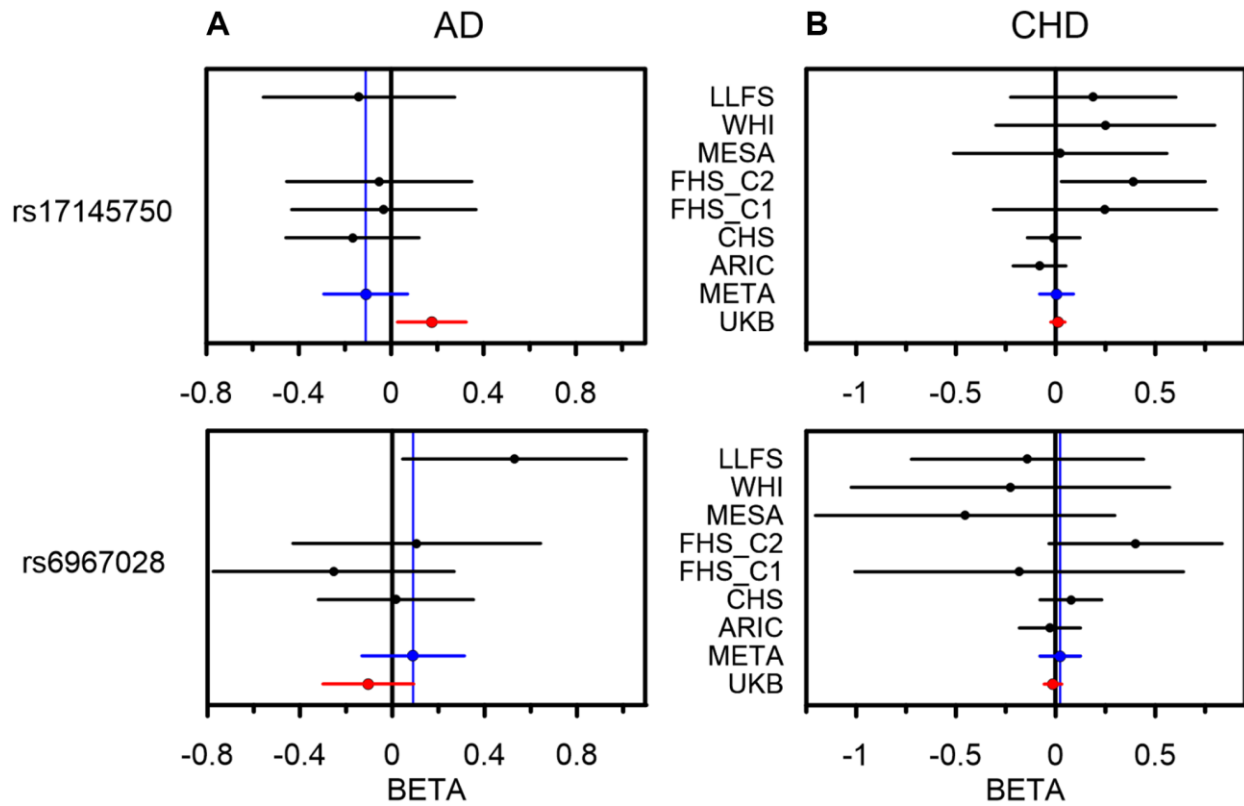

**Supplementary Figure 2. Associations of rs17145750 and rs6967028 from the *MLXIPL* gene locus with AD and CHD in each cohort separately.** The results are presented for cohorts included in the meta-analysis (black dots), the meta-analysis itself (META, blue dots), and UKB (red dots) for comparison. The X-axis shows the effect sizes beta of the associations with the outcomes: **(A)** AD and **(B)** CHD. The horizontal lines indicate 95% confidence intervals. Blue vertical lines represent the effect sizes in the US meta-analysis.

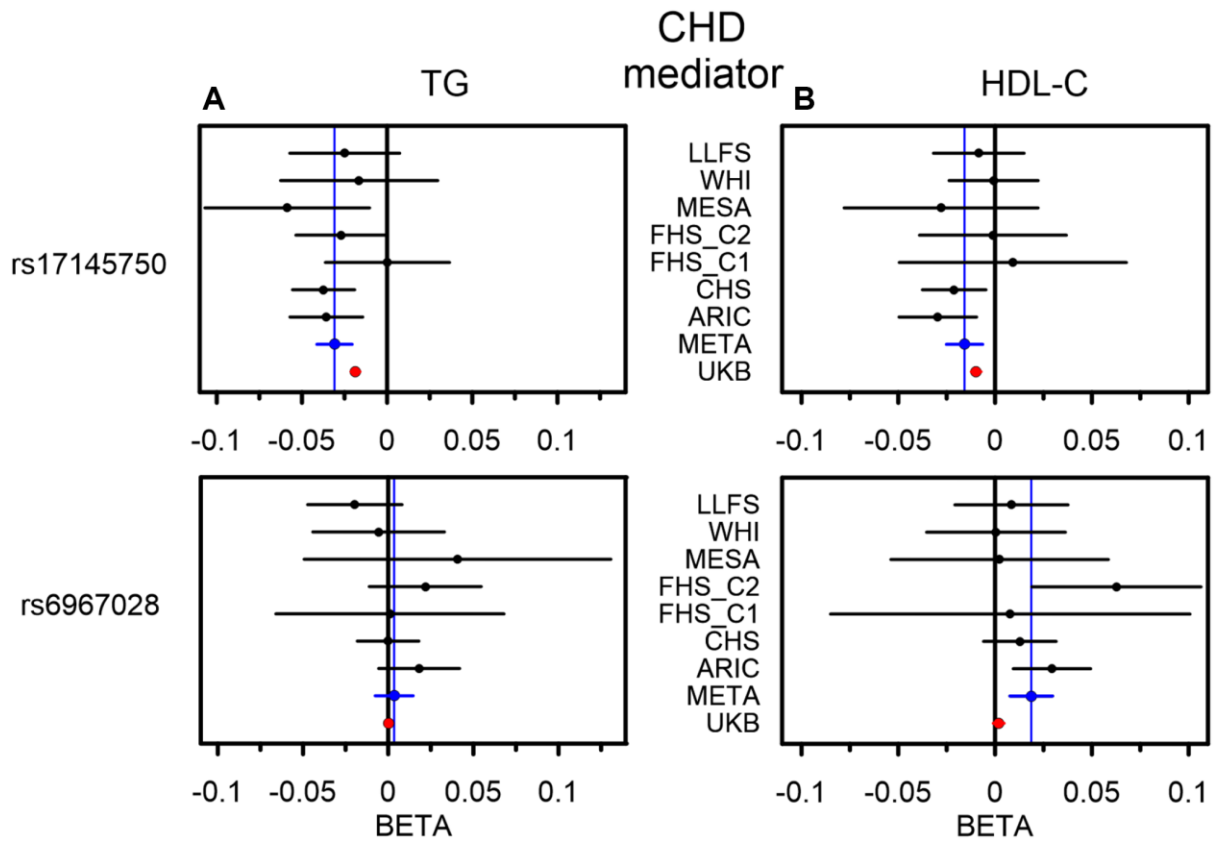

**Supplementary Figure 3. Indirect effect through TG and HDL-C in the associations of rs17145750 and rs6967028 from the *MLXIPL* gene locus with CHD in each cohort separately.** The results are presented for cohorts included in the meta-analysis (black dots), the meta-analysis itself (META, blue dots), and UKB (red dots) for comparison. The X-axis shows the effect sizes beta of the indirect effect (IE) through (A) TG and (B) HDL-C in the associations with CHD. The horizontal lines indicate 95% confidence intervals. Blue vertical lines represent the effect sizes in the US meta-analysis.

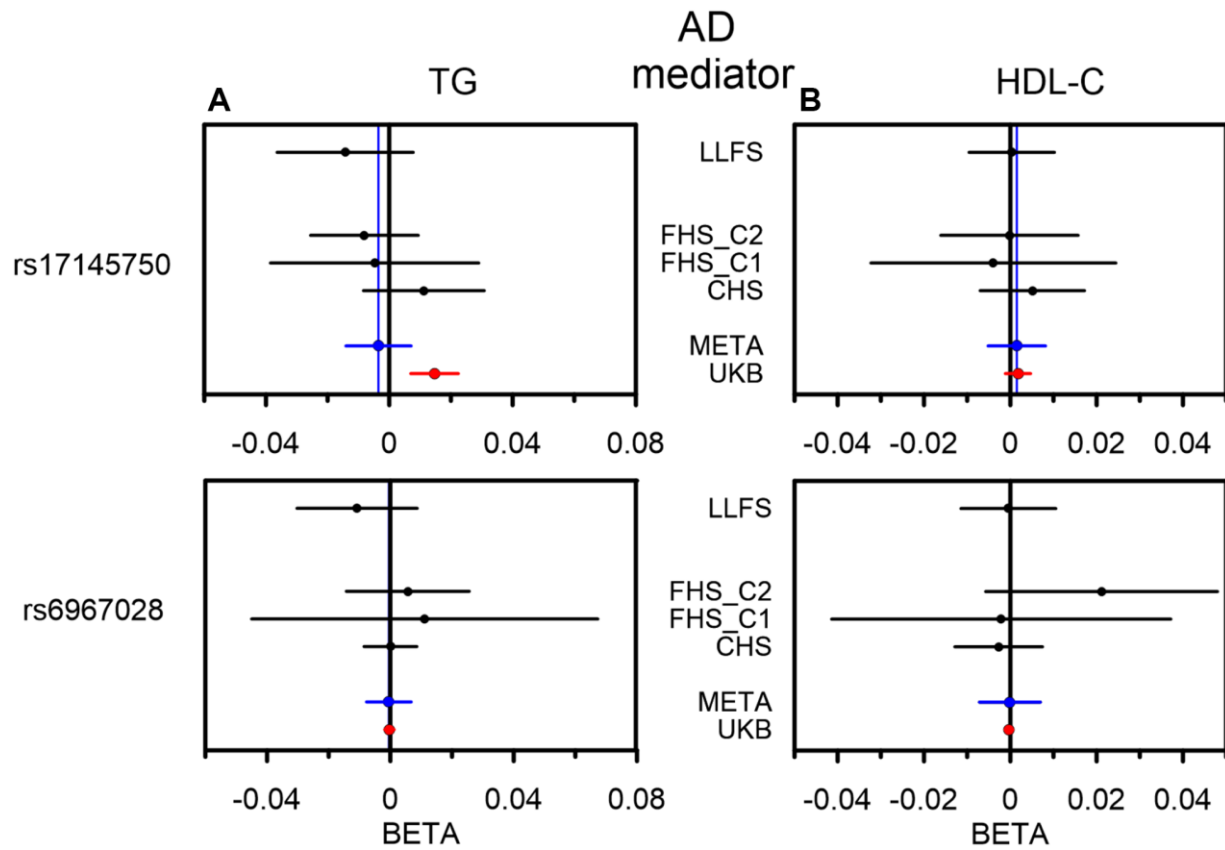

**Supplementary Figure 4. Indirect effect through TG and HDL-C in the associations of rs17145750 and rs6967028 from the *MLXIPL* gene locus with AD in each cohort separately.** The results are presented for cohorts included in the meta-analysis (black dots), the meta-analysis itself (META, blue dots), and UKB (red dots) for comparison. The X-axis shows the effect sizes beta of the indirect effect (IE) through (A) TG and (B) HDL-C in the associations with AD. The horizontal lines indicate 95% confidence intervals. Blue vertical lines represent the effect sizes in the US meta-analysis.

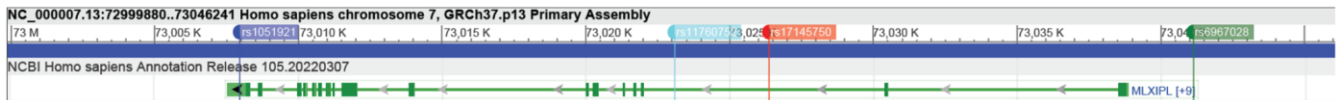

**Supplementary Figure 5. Position of four selected SNPs in the *MLXIPL* gene region. (From dbSNP, NCBI).**
