# Supplementary material for: Exogenous exposures shape genetic predisposition to lipids, Alzheimer’s, and coronary heart disease in the MLXIPL gene locus
Source: Aging (Albany NY). 2023 Apr 18;15(9):3249–72. doi: 10.18632/aging.204665 (PMC10449285; doi:10.18632/aging.204665)
Supplement: Supplementary Table 1 [file aging-15-204665-s003.xlsx]

## Sheet: Supplementary Table 1
Supplementary Table 1. Basic demographic information for the genotyped participants in the selected studies.
STUDY	ARIC	CHS	FHS_C1	FHS_C2	MESA	WHI	LLFS	META	META_AD	UKB
N	8386	4101	348	2702	2249	965	3961	22712	11112	232341
Women	4644 (55.38)	2362 (57.60)	242 (69.54)	1553 (57.5)	1206 (53.62)	965 (100)	2250 (56.80)	13222 (58.21)	6407 (57.66)	128351 (55.24)
BCrange	1921-1944	1885-1925	1900-1920	1910-1960	1917-1957	1914-1943	1896-1964			1936-1952
LS	75.55 (6.89)	83.43 (5.36)	92.19 (5.37)	76.53 (8.73)	72.54 (10.0)	77.5 (7.3)	78.23 (13.5)			71.37 (7.9)
AD	NA	244 (5.95)	124 (35.63)	105 (3.89)	NA	NA	114 (2.9)		587 (5.28)	809 (0.35)
CHD	1113 (13.27)	1077 (26.26)	44 (12.50)	145 (5.36)	70 (3.1)	55 (5.7)	104 (2.6)	2608 (11.48)		15269 (6.6)
DEATH	3023 (36.05)	2056 (50.21)	336 (96.26)	748 (27.68)	248 (11.0)	178 (18.44)	1072 (27.0)			11615 (5.0)
Latest Exam
Age	67.16 (8.26)	82.83 (5.60)	85.69 (4.01)	69.64 (8.84)	70.14 (9.78)	69.26 (7.04)	73.86 (14.52)			63.14 (8.31)
BMI	28.17 (5.50)	26.45 (4.61)	26.10 (4.44)	28.23 (5.44)	27.78 (5.31)	28.84 (5.55)	27.26 (4.91)			27.55 (4.72)
HDL-C	49.73 (16.19)	52.72 (14.61)	53.82 (16.74)	60.16 (18.93)	56.33 (17.50)	58.49 (15.11)	62.38 (18.51)			58.19 (15.50)
LDL-C	119.29 (36.52)	127.05 (35.42)	104.68 (30.45)	105.25 (32.00)	103.39 (32.63)	124.97 (33.58)	118.23 (35.78)			140.43 (33.67)
TC	198.45 (40.76)	209.28 (39.08)	188.99 (34.85)	189.42 (37.15)	185.65 (37.22)	214.80 (36.49)	201.73 (41.74)			224.72 (44.27)
TG	146.37 (89.23)	147.89 (79.82)	154.26 (86.25)	120.49 (66.63)	114.62 (71.61)	157.28 (71.48)	105.78 (78.24)			152.27 (86.09)
Abbreviation	Meaning
ARIC	= the Atherosclerosis Risk in Communities study
CHS	= Cardiovascular Health Study
FHS_C1	= Framingham Heart Study parental cohorts
FHS_C2	= Framingham Heart Study offspring cohorts
MESA	= Multi-Ethnic Study of Atherosclerosis
WHI	= Women’s Health Initiative
LLFS	= Long Life Family Study
UKB	= UK Biobank
META	= meta-analysis of continuous outcomes and CHD
META_AD	= meta-analysis of AD
N	= sample size of a sduty
BCrange	= range of bith years of participants
LS	= life-span
AD	= Alzheimer's disease
CHD	= coronary heart disease
DEATH	= number of deaths
BMI	= body mass index
HDL-C	= high-density lipoprotein cholesterol
LDL-C	= low-density lipoprotein cholesterol
TC	= total cholesterol
TG	= triglycerides
Numbers in the parentheses refer to percentages for Women, AD, CHD, and DEATH variables; and to standard deviation for other variables.
The follow-up data on diseases and death were available through 2004 in ARIC and CHS, 2011 in FHS cohorts, 2012 in MESA and WHI, and 2019 in LLFS and UKB.

## Sheet: Notes
Abbreviation	Meaning
ARIC	= the Atherosclerosis Risk in Communities study
CHS	= Cardiovascular Health Study
FHS_C1	= Framingham Heart Study parental cohorts
FHS_C2	= Framingham Heart Study offspring cohorts
MESA	= Multi-Ethnic Study of Atherosclerosis
WHI	= Women’s Health Initiative
LLFS	= Long Life Family Study
UKB	= UK Biobank
META	= meta-analysis of continuous outcomes and CHD
META_AD	= meta-analysis of AD
N	= sample size of a sduty
BCrange	= range of bith years of participants
LS	= life-span
AD	= Alzheimer's disease
CHD	= coronary heart disease
DEATH	= number of deaths
BMI	= body mass index
HDL-C	= high-density lipoprotein cholesterol
LDL-C	= low-density lipoprotein cholesterol
TC	= total cholesterol
TG	= triglycerides
Numbers in the parentheses refer to percentages for Women, AD, CHD, and DEATH variables; and to standard deviation for other variables.
The follow-up data on diseases and death were available through 2004 in ARIC and CHS, 2011 in FHS cohorts, 2012 in MESA and WHI, and 2019 in LLFS and UKB.
