# Supplementary material for: Exogenous exposures shape genetic predisposition to lipids, Alzheimer’s, and coronary heart disease in the MLXIPL gene locus
Source: Aging (Albany NY). 2023 Apr 18;15(9):3249–72. doi: 10.18632/aging.204665 (PMC10449285; doi:10.18632/aging.204665)
Supplement: Supplementary Table 2 [file aging-15-204665-s004.xlsx]

## Sheet: Supplementary Table 2
Supplementary Table 2. Information on selected SNPs and their minor allele frequency (MAF) in each cohort.
SNP	CHR	POSITION	Major Allele	Minor Allele	Fn	ARIC	CHS	FHS_C1	FHS_C2	MESA	WHI	LLFS	UKB
rs1051921	7	73007943	G	A	3'UTR	0.187873	0.194952	0.186969	0.182724	0.176745	0.219171	0.196043	0.197349
rs17145750	7	73026378	C	T	intron, genic upstream transcript variant	0.151835	0.157927	0.152975	0.149207	0.147621	0.176836	0.165148	0.161044
rs6967028	7	73041130	T	C	regulatory region variant	0.0965246	0.0924976	0.0835694	0.0847802	0.0898177	0.0837642	0.0851319	0.0858793
rs11760752	7	73023062	C	A	intron, genic upstream transcript variant	0.182045	0.188293	0.186969	0.206165	0.194667	0.187694	0.188774	0.185574
Abbreviation	Meaning
ARIC	= the Atherosclerosis Risk in Communities study
CHS	= Cardiovascular Health Study
FHS_C1	= Framingham Heart Study parental cohorts
FHS_C2	= Framingham Heart Study offspring cohorts
MESA	= Multi-Ethnic Study of Atherosclerosis
WHI	= Women’s Health Initiative
LLFS	= Long Life Family Study
UKB	= UK Biobank
SNP	= single nucleotide polymorphism
CHR	= chromosome
POSITION	= SNP position given in Genome Reference Consortium Human Build 37 (GRCh37)
Fn	= SNP function
Numbers represent minor allele frequency (MAF).

## Sheet: Notes
Abbreviation	Meaning
ARIC	= the Atherosclerosis Risk in Communities study
CHS	= Cardiovascular Health Study
FHS_C1	= Framingham Heart Study parental cohorts
FHS_C2	= Framingham Heart Study offspring cohorts
MESA	= Multi-Ethnic Study of Atherosclerosis
WHI	= Women’s Health Initiative
LLFS	= Long Life Family Study
UKB	= UK Biobank
SNP	= single nucleotide polymorphism
CHR	= chromosome
POSITION_GRCh37	= SNP position given in Genome Reference Consortium Human Build 37 (GRCh37)
Fn	= SNP function
Numbers represent minor allele frequency (MAF).
