# Supplementary material for: Exogenous exposures shape genetic predisposition to lipids, Alzheimer’s, and coronary heart disease in the MLXIPL gene locus
Source: Aging (Albany NY). 2023 Apr 18;15(9):3249–72. doi: 10.18632/aging.204665 (PMC10449285; doi:10.18632/aging.204665)
Supplement: Supplementary Table 3 [file aging-15-204665-s005.xlsx]

## Sheet: Supplementary Table 3
Supplementary Table 3. Linkage disequilibrium (LD), r2, of selected SNPs in each cohort.
SNP1	SNP2	ARIC	CHS	FHS_C1	FHS_C2	MESA	WHI	LLFS	UKB
rs1051921	rs17145750	0.733806	0.731721	0.73699	0.750751	0.766752	0.737073	0.802661	0.745676
rs1051921	rs6967028	0.0226136	0.0242163	0.020812	0.014679	0.0177274	0.0236216	0.0286605	0.0219884
rs1051921	rs11760752	0.0436258	0.0454582	0.056412	0.0512163	0.0362175	0.0449473	0.0475263	0.0518841
rs17145750	rs6967028	0.0199204	0.0174461	0.0248979	0.0108908	0.0171238	0.0207921	0.0249082	0.0178137
rs17145750	rs11760752	0.036205	0.0345022	0.042826	0.0402975	0.0294302	0.0276962	0.0381627	0.042947
rs6967028	rs11760752	0.0295202	0.0252399	0.0067572	0.0241045	0.0277241	0.0323736	0.0218103	0.0216775
Abbreviation	Meaning
ARIC	= the Atherosclerosis Risk in Communities study
CHS	= Cardiovascular Health Study
FHS_C1	= Framingham Heart Study parental cohorts
FHS_C2	= Framingham Heart Study offspring cohorts
MESA	= Multi-Ethnic Study of Atherosclerosis
WHI	= Women’s Health Initiative
LLFS	= Long Life Family Study
UKB	= UK Biobank
SNP1	= first SNP
SNP2	= second SNP
Numbers represent Linkage Disequilibrium (LD), r2.

## Sheet: Notes
Abbreviation	Meaning
ARIC	= the Atherosclerosis Risk in Communities study
CHS	= Cardiovascular Health Study
FHS_C1	= Framingham Heart Study parental cohorts
FHS_C2	= Framingham Heart Study offspring cohorts
MESA	= Multi-Ethnic Study of Atherosclerosis
WHI	= Women’s Health Initiative
LLFS	= Long Life Family Study
UKB	= UK Biobank
SNP1	= first SNP
SNP2	= second SNP
Numbers represent Linkage Disequilibrium (LD), r2.
