# Supplementary material for: Exogenous exposures shape genetic predisposition to lipids, Alzheimer’s, and coronary heart disease in the MLXIPL gene locus
Source: Aging (Albany NY). 2023 Apr 18;15(9):3249–72. doi: 10.18632/aging.204665 (PMC10449285; doi:10.18632/aging.204665)
Supplement: Supplementary Table 4 [file aging-15-204665-s006.xlsx]

## Sheet: Supplementary Table 4
Supplementary Table 4. Pearson correlation between considered phenotypes in each cohort.
Pheno1	Pheno2	ARIC	CHS	FHS_C1	FHS_C2	MESA	WHI	LLFS	UKB
TG	HDL-C	-0.372762	-0.415081	-0.462305	-0.445392	-0.401346	-0.477487	-0.43677	-0.418933
TG	LDL-C	0.0315519	0.0291619	0.0806257	0.0886117	0.0455561	0.0031935	0.0757851	0.210481
TG	TC	0.317064	0.279734	0.275301	0.194078	0.23606	0.196592	0.177084	0.210902
HDL-C	LDL-C	-0.0711289	-0.033476	-0.07767	-0.0218125	-0.0289765	-0.0238703	0.0495437	0.117077
HDL-C	TC	0.171773	0.173957	0.202935	0.338833	0.290648	0.205243	0.365848	0.347875
LDL-C	TC	0.882689	0.905592	0.873004	0.882125	0.880758	0.911188	0.904582	0.951261
TG	CHD	0.1101	0.110168	0.00858516	0.0630324	0.0810442	0.0394005	0.0414473	0.0607967
HDL-C	CHD	-0.181461	-0.15131	-0.0429137	-0.103217	-0.0808433	0.00013949	-0.0610284	-0.0961948
LDL-C	CHD	0.121357	0.0315518	-0.0388204	0.0485241	0.0306854	0.0141066	0.0175765	-0.0443309
TC	CHD	0.0855974	0.0170492	-0.0463853	0.0123512	0.0201062	0.028586	-1.94985e-05	-0.0619729
TG	AD		-0.0196842	-0.0248065	0.0155449			0.0476672	-0.00389425
HDL-C	AD		0.0248204	0.0694456	-0.0287059			-0.0445402	0.000886951
LDL-C	AD		0.0143586	-0.014004	0.0391129			-0.0247654	-0.00548384
TC	AD		0.0143499	0.0167053	0.0251927			-0.0268247	-0.00525629
CHD	AD		-0.00517032	-0.0527087	-0.032138			0.0497715	0.0167942
GRAY COLOR	= non-significant
Abbreviation	Meaning
ARIC	= the Atherosclerosis Risk in Communities study
CHS	= Cardiovascular Health Study
FHS_C1	= Framingham Heart Study parental cohorts
FHS_C2	= Framingham Heart Study offspring cohorts
MESA	= Multi-Ethnic Study of Atherosclerosis
WHI	= Women’s Health Initiative
LLFS	= Long Life Family Study
UKB	= UK Biobank
Pheno1	= first phenotype
Pheno2	= second phenotype
AD	= Alzheimer's disease
CHD	= coronary heart disease
HDL-C	= high-density lipoprotein cholesterol
LDL-C	= low-density lipoprotein cholesterol
TC	= total cholesterol
TG	= triglycerides
Numbers represent Pearson correlation coefficient.

## Sheet: Notes
Abbreviation	Meaning
ARIC	= the Atherosclerosis Risk in Communities study
CHS	= Cardiovascular Health Study
FHS_C1	= Framingham Heart Study parental cohorts
FHS_C2	= Framingham Heart Study offspring cohorts
MESA	= Multi-Ethnic Study of Atherosclerosis
WHI	= Women’s Health Initiative
LLFS	= Long Life Family Study
UKB	= UK Biobank
Pheno1	= first phenotype
Pheno2	= second phenotype
AD	= Alzheimer's disease
CHD	= coronary heart disease
HDL-C	= high-density lipoprotein cholesterol
LDL-C	= low-density lipoprotein cholesterol
TC	= total cholesterol
TG	= triglycerides
Numbers represent Pearson correlation coefficient.
