# Supplementary material for: Exogenous exposures shape genetic predisposition to lipids, Alzheimer’s, and coronary heart disease in the MLXIPL gene locus
Source: Aging (Albany NY). 2023 Apr 18;15(9):3249–72. doi: 10.18632/aging.204665 (PMC10449285; doi:10.18632/aging.204665)
Supplement: Supplementary Table 5A [file aging-15-204665-s007.xlsx]

## Sheet: Supplementary Table 5A
Supplementary Table 5A. Univariate conditional and unconditional associations of the SNPs from the MLXIPL gene locus with lipids in the US cohorts: adjustment by additional phenotype.
					META: CHD sample							META: AD sample							ARIC			CHS			FHS_C1			FHS_C2			MESA			WHI			LLFS
OUTCOME	Adjustment	SNP	coefName	EA	BETA	SE	P	Direction	HetISq	HetChiSq	HetPVal	BETA	SE	P	Direction	HetISq	HetChiSq	HetPVal	BETA	SE	P	BETA	SE	P	BETA	SE	P	BETA	SE	P	BETA	SE	P	BETA	SE	P	BETA	SE	P
TG	NO	rs1051921	rs1051921	A	-8.8986	0.6829	8.283e-39	-------	33.9	9.083	0.169	-8.3425	0.8785	2.163e-21	----	51.9	6.231	0.1009	-9.11668	1.3257	6.11825e-12	-9.49774	1.81189	1.58926e-07	-12.1504	4.92293	0.0135825	-9.10093	1.18405	1.51516e-14	-9.66074	2.22813	1.45225e-05	-14.1694	3.45502	4.11182e-05	-3.78301	2.08209	0.0692282
TG	NO	rs17145750	rs17145750	A	-10.2038	0.743	6.47e-43	-------	43	10.533	0.1039	-10.3789	0.9568	2.04e-27	----	70.5	10.182	0.01708	-9.699	1.44739	2.06929e-11	-11.2755	1.89007	2.43693e-09	-11.7276	5.22511	0.0248028	-11.9707	1.29643	2.61703e-20	-9.81864	2.47536	7.29216e-05	-11.6587	3.65723	0.0014333	-3.63247	2.32847	0.118754
TG	NO	rs6967028	rs6967028	G	3.7276	0.9545	9.417e-05	+++++--	71.1	20.753	0.002032	3.9632	1.2407	0.001401	+++-	85.2	20.325	0.0001453	3.21857	1.74643	0.0653375	0.243371	2.60004	0.925425	2.94835	6.51739	0.650994	9.21512	1.73541	1.09587e-07	4.3675	3.12333	0.162009	-0.102159	7.95288	0.989751	-3.89336	2.601	0.134427
TG	NO	rs11760752	rs11760752	A	1.5642	0.6899	0.02338	++-+-++	14.1	6.988	0.3219	1.9368	0.8592	0.02419	+-++	40.8	5.065	0.1671	1.61646	1.45229	0.265692	1.62954	1.9944	0.413895	-8.95352	4.97991	0.0721882	2.35571	1.13635	0.038168	-1.17808	2.14125	0.582194	2.91182	4.45464	0.513331	2.59206	1.85059	0.161314
TG	HDLC	rs1051921	rs1051921	A	-6.8889	0.6063	6.386e-30	-------	37.1	9.542	0.1453	-6.0272	0.7871	1.892e-14	----	9.5	3.313	0.3458	-7.55353	1.15031	5.14993e-11	-7.90443	1.61381	9.68189e-07	-6.65845	4.21051	0.11379	-6.03141	1.06638	1.54987e-08	-7.98407	1.9433	3.98217e-05	-14.198	3.48913	4.71753e-05	-3.48486	1.8308	0.0569798
TG	HDLC	rs17145750	rs17145750	A	-7.8386	0.6594	1.381e-32	-------	17.2	7.249	0.2984	-7.7012	0.8548	2.08e-19	----	51.1	6.136	0.1052	-7.66995	1.24723	7.76897e-10	-8.58178	1.67961	3.23214e-07	-7.32797	4.46342	0.100635	-8.78253	1.16732	5.32591e-14	-7.89136	2.16821	0.000273086	-11.6787	3.7149	0.00166799	-3.07129	2.07102	0.138078
TG	HDLC	rs6967028	rs6967028	G	1.76	0.8403	0.03622	+--+++-	72.9	22.11	0.001157	1.8501	1.0861	0.08848	--+-	86.1	21.54	8.13e-05	1.1241	1.55155	0.468757	-1.48977	2.27389	0.512363	-0.686037	5.55518	0.901715	6.91201	1.55642	8.95561e-06	3.23177	2.70789	0.232688	0.222219	8.23386	0.978469	-4.55544	2.1767	0.0363653
TG	HDLC	rs11760752	rs11760752	A	1.5789	0.6113	0.009799	++-+-++	17.2	7.251	0.2983	1.9	0.761	0.01254	+-++	49.3	5.919	0.1156	1.49506	1.28138	0.243308	2.23643	1.76693	0.205614	-8.03576	4.23982	0.0580515	1.95528	1.02261	0.0558704	-0.320591	1.83782	0.861519	2.96694	4.55027	0.514378	2.88781	1.60071	0.0712187
TG	LDLC	rs1051921	rs1051921	A	-9.2256	0.6499	9.875e-46	-------	39	9.84	0.1315	-8.9034	0.8158	9.871e-28	----	59.6	7.417	0.05972	-9.11958	1.32557	5.99606e-12	-9.36661	1.82139	2.71033e-07	-11.6583	4.71094	0.0133334	-9.90208	1.03957	1.64811e-21	-9.63645	2.22993	1.55034e-05	-14.0981	3.25715	1.50219e-05	-3.77456	2.08033	0.0696158
TG	LDLC	rs17145750	rs17145750	A	-10.1757	0.708	7.765e-47	-------	39.9	9.988	0.1251	-10.3052	0.8855	2.666e-31	----	69	9.667	0.02162	-9.69915	1.44745	2.07238e-11	-11.1371	1.89432	4.12253e-09	-11.4332	4.9968	0.0221315	-11.5466	1.13846	3.58621e-24	-9.7978	2.47574	7.5731e-05	-11.7408	3.56653	0.000994969	-3.65221	2.32195	0.115741
TG	LDLC	rs6967028	rs6967028	G	3.1882	0.9062	0.0004343	+++++--	60.2	15.09	0.01957	3.2238	1.1547	0.005241	+++-	78.9	14.195	0.002652	3.22168	1.74554	0.0649405	0.0605909	2.59629	0.981381	4.34523	6.23232	0.485672	6.71983	1.53234	1.1581e-05	4.46424	3.1011	0.14999	-1.30395	5.24768	0.803763	-3.84793	2.58819	0.137088
TG	LDLC	rs11760752	rs11760752	A	2.0394	0.6512	0.001739	++-+-++	23.3	7.826	0.2512	2.5399	0.7924	0.001348	+-++	38.6	4.887	0.1803	1.61991	1.45378	0.265164	1.60869	1.99617	0.420306	-7.2421	4.76388	0.128458	3.21001	0.998459	0.00130461	-1.19793	2.13703	0.575099	3.55884	3.79272	0.348073	2.52404	1.83154	0.168175
TG	TC	rs1051921	rs1051921	A	-8.2128	0.6577	8.712e-36	-------	30.6	8.649	0.1943	-7.9769	0.8493	5.839e-21	----	50.2	6.021	0.1106	-7.84162	1.27168	6.98895e-10	-9.82993	1.75968	2.32083e-08	-9.33529	4.71668	0.0477926	-8.46604	1.13016	6.83602e-14	-8.53111	2.21204	0.000114943	-13.1008	3.13285	2.89253e-05	-3.54325	2.05614	0.0848418
TG	TC	rs17145750	rs17145750	A	-9.7298	0.7164	5.094e-42	-------	46.1	11.135	0.08429	-10.1401	0.92	2.994e-28	----	71.1	10.396	0.01548	-8.90803	1.39742	1.83397e-10	-11.6833	1.83194	1.79915e-10	-8.95865	4.99371	0.0728153	-11.4741	1.23744	1.8187e-20	-8.81845	2.44219	0.000305169	-10.6247	3.40819	0.0018245	-3.5033	2.28381	0.125037
TG	TC	rs6967028	rs6967028	G	3.8081	0.9109	2.91e-05	++++++-	62.8	16.142	0.01301	4.1308	1.1984	0.000567	+++-	79.9	14.929	0.001878	2.95751	1.63847	0.0710674	1.9567	2.53135	0.43953	8.53787	6.22978	0.170534	7.89111	1.65686	1.91028e-06	5.8233	3.13046	0.0628566	0.204401	5.51567	0.970439	-3.38733	2.56861	0.187255
TG	TC	rs11760752	rs11760752	A	1.1642	0.6636	0.07934	++-+-++	0	5.638	0.4649	1.5446	0.8242	0.06093	+-++	1.5	3.046	0.3846	0.905425	1.39004	0.51481	1.45871	1.93873	0.451808	-6.54711	4.77672	0.17049	1.7361	1.08444	0.109397	-1.69501	2.14641	0.429704	3.99908	3.73478	0.284274	2.22963	1.81166	0.218432
HDLC	NO	rs1051921	rs1051921	A	0.9751	0.1284	3.148e-14	+++++++	19	7.408	0.2848	1.0911	0.1578	4.68e-12	++++	44.3	5.391	0.1453	0.713935	0.257371	0.00553801	0.652434	0.353511	0.0649528	1.18564	0.810482	0.1435	1.31472	0.188216	2.84495e-12	0.858603	0.55007	0.118548	0.54535	0.761644	0.473981	0.152847	0.603222	0.799971
HDLC	NO	rs17145750	rs17145750	A	1.1477	0.1411	4.167e-16	+++++++	0	5.335	0.5016	1.272	0.1749	3.566e-13	++++	7.6	3.248	0.3549	0.916812	0.284908	0.0012912	1.11085	0.395149	0.00493558	0.930742	0.84843	0.272634	1.44091	0.206146	2.75298e-12	0.988391	0.598261	0.0985131	0.420443	0.84002	0.616713	0.28509	0.650021	0.660962
HDLC	NO	rs6967028	rs6967028	G	-0.9095	0.1754	2.145e-07	-------	0	2.091	0.9111	-0.8855	0.2261	8.982e-05	----	0	0.883	0.8296	-0.926216	0.321148	0.00392565	-0.726705	0.480073	0.130092	-1.38039	1.05407	0.190336	-0.971655	0.279235	0.000501968	-0.650204	0.653575	0.319813	-2.01112	1.09233	0.0656032	-0.335148	0.79642	0.673888
HDLC	NO	rs11760752	rs11760752	A	-0.1073	0.1239	0.3868	-++-+-+	0	5.269	0.5097	-0.1773	0.1514	0.2415	++-+	5.8	3.183	0.3642	-0.0277062	0.24299	0.90922	0.26339	0.364487	0.469905	0.0901676	0.824177	0.912883	-0.348595	0.180884	0.0539582	0.527304	0.521008	0.311498	-0.600519	0.851433	0.480621	0.258206	0.53214	0.627519
HDLC	TG	rs1051921	rs1051921	A	0.4705	0.1182	6.841e-05	++++++-	18.4	7.355	0.2892	0.5493	0.1473	0.0001914	+++-	51.6	6.193	0.1026	0.30473	0.232402	0.189783	0.106144	0.320136	0.740223	0.47428	0.720518	0.510378	0.786906	0.17617	7.94221e-06	0.427606	0.513146	0.404674	0.074056	0.728603	0.919042	-0.287323	0.532895	0.589766
HDLC	TG	rs17145750	rs17145750	A	0.5416	0.1298	3.004e-05	++++++-	0	2.993	0.8097	0.5837	0.1577	0.000214	+++-	0	2.449	0.4845	0.485491	0.256686	0.0585741	0.466084	0.358664	0.193772	0.16399	0.755179	0.828089	0.724644	0.193092	0.000174845	0.54859	0.557908	0.32546	0.0259348	0.794493	0.973959	-0.119711	0.573175	0.834561
HDLC	TG	rs6967028	rs6967028	G	-0.6484	0.1603	5.219e-05	-------	0	2.759	0.8384	-0.5552	0.206	0.007041	----	0	0.69	0.8756	-0.786215	0.293867	0.00746375	-0.706238	0.427773	0.0987459	-0.969801	0.936248	0.300278	-0.425903	0.260708	0.102334	-0.451028	0.595194	0.448581	-1.90214	1.0199	0.0621775	-0.803287	0.667487	0.228802
HDLC	TG	rs11760752	rs11760752	A	0.0058	0.1134	0.9594	++--+-+	5.5	6.352	0.3849	-0.035	0.1409	0.8038	+--+	37.9	4.831	0.1846	0.04758	0.218725	0.827793	0.352723	0.327036	0.280792	-0.655433	0.731029	0.369938	-0.188597	0.169072	0.264645	0.465922	0.479419	0.331126	-0.539466	0.793085	0.49637	0.600698	0.462227	0.193747
HDLC	LDLC	rs1051921	rs1051921	A	0.9715	0.1278	2.958e-14	+++++++	22.4	7.732	0.2584	1.1031	0.1578	2.731e-12	++++	42.5	5.22	0.1564	0.677938	0.255678	0.00801285	0.691368	0.351912	0.0494601	1.10696	0.813183	0.173428	1.32214	0.187336	1.69442e-12	0.845796	0.54899	0.123405	0.541785	0.760713	0.476336	0.148338	0.600675	0.804946
HDLC	LDLC	rs17145750	rs17145750	A	1.1541	0.1405	2.165e-16	+++++++	0	5.67	0.4611	1.282	0.1741	1.776e-13	++++	10.9	3.366	0.3386	0.910241	0.283533	0.00132572	1.14907	0.393461	0.00349572	0.869732	0.851114	0.30684	1.45289	0.205192	1.43469e-12	0.976922	0.597367	0.101969	0.413528	0.839113	0.622143	0.278019	0.647354	0.667581
HDLC	LDLC	rs6967028	rs6967028	G	-0.8822	0.1746	4.346e-07	-------	0	1.895	0.9291	-0.8549	0.2259	0.0001547	----	0	0.845	0.8386	-0.887654	0.319157	0.00541511	-0.779389	0.477803	0.102849	-1.50149	1.05655	0.15528	-0.90258	0.277981	0.00116667	-0.688169	0.653099	0.292021	-1.94672	1.09284	0.0748558	-0.343404	0.792343	0.664722
HDLC	LDLC	rs11760752	rs11760752	A	-0.0911	0.1235	0.4606	+++-+-+	0	5.207	0.5176	-0.1626	0.1515	0.2831	++-+	0.1	3.002	0.3914	0.00268413	0.242245	0.991159	0.257532	0.362775	0.47777	0.0894702	0.825841	0.913727	-0.329214	0.179999	0.0674029	0.537175	0.519668	0.301282	-0.6391	0.849006	0.451592	0.268876	0.53234	0.6135
HDLC	TC	rs1051921	rs1051921	A	1.0242	0.1273	8.67e-16	+++++++	22.5	7.742	0.2576	1.1346	0.1575	5.902e-13	++++	49.3	5.912	0.116	0.761488	0.256214	0.00295797	0.627546	0.351617	0.0743032	1.42417	0.802404	0.0759187	1.35865	0.18651	3.22604e-13	0.959062	0.53997	0.07571	0.712175	0.749929	0.342287	0.238376	0.591335	0.686863
HDLC	TC	rs17145750	rs17145750	A	1.1854	0.1398	2.313e-17	+++++++	0	4.938	0.5518	1.3094	0.168	6.462e-15	++++	5.6	3.177	0.3651	0.945851	0.283327	0.00084272	1.07949	0.392395	0.00594084	1.1565	0.840175	0.168667	1.47247	0.204275	5.66745e-13	1.07901	0.586801	0.0659449	0.5952	0.827316	0.471873	0.367865	0.639817	0.565322
HDLC	TC	rs6967028	rs6967028	G	-0.9067	0.174	1.882e-07	-------	0	3.141	0.7909	-0.8835	0.2257	9.096e-05	----	0	1.634	0.6517	-0.939131	0.319459	0.00328468	-0.598913	0.479227	0.211392	-1.05171	1.04492	0.314176	-1.05551	0.276768	0.000136906	-0.55196	0.64357	0.391084	-2.07171	1.06871	0.0525618	-0.151332	0.788488	0.847799
HDLC	TC	rs11760752	rs11760752	A	-0.1446	0.1229	0.2396	-++-+-+	0	5.475	0.4845	-0.2217	0.1512	0.1424	++-+	12	3.409	0.3328	-0.0529356	0.242018	0.826864	0.251179	0.3636	0.489684	0.275728	0.815813	0.735379	-0.39739	0.179255	0.0266299	0.483405	0.513768	0.346755	-0.530129	0.844936	0.530384	0.081792	0.519277	0.874842
LDLC	NO	rs1051921	rs1051921	A	-0.199	0.2758	0.4706	-+-----	23	7.788	0.2541	0.0806	0.3606	0.8232	+---	52.5	6.322	0.09696	-0.638943	0.504623	0.205449	1.82737	0.893493	0.0408348	-2.3867	1.67857	0.155065	-0.128797	0.442458	0.77098	-0.57371	0.939828	0.541569	-0.146717	1.45462	0.919659	-0.19142	1.0533	0.855792
LDLC	NO	rs17145750	rs17145750	A	0.1596	0.3033	0.5987	-+-+---	0	5.764	0.4502	0.4319	0.395	0.2742	+-+-	32.6	4.454	0.2165	-0.0945433	0.558921	0.865676	1.85542	0.985906	0.0598442	-2.0717	1.77085	0.242045	0.398136	0.484608	0.411325	-0.498635	1.03104	0.628652	-0.583622	1.59482	0.714404	-0.283941	1.17072	0.808365
LDLC	NO	rs6967028	rs6967028	G	0.0377	0.3848	0.9219	+--+-+-	68.6	19.124	0.00396	-0.0314	0.5181	0.9517	--+-	78.4	13.868	0.003091	0.562358	0.681017	0.408939	-2.49565	1.18666	0.0354582	-5.41334	2.194	0.0136121	1.1902	0.649639	0.0669363	-2.15574	1.23491	0.08087	2.68543	2.16864	0.215604	-0.0869879	1.50442	0.953891
LDLC	NO	rs11760752	rs11760752	A	0.3958	0.2798	0.1571	+--++-+	0	3.696	0.7177	0.3546	0.3551	0.318	--++	0	2.084	0.5552	0.676123	0.537829	0.208705	-0.266498	0.931136	0.774719	-1.58964	1.69268	0.347668	0.578596	0.424512	0.172892	0.506487	0.955859	0.596198	-1.40362	1.55888	0.367906	0.517452	1.14534	0.651422
LDLC	TG	rs1051921	rs1051921	A	-0.1652	0.2763	0.55	-+-----	15.7	7.118	0.31	0.147	0.361	0.6839	+---	43.6	5.316	0.1501	-0.670083	0.505471	0.184952	1.66612	0.894872	0.0626232	-2.34923	1.68142	0.162364	-0.0240888	0.44312	0.956647	-0.505784	0.942846	0.591652	-0.122327	1.45381	0.932943	-0.0460224	1.06008	0.965371
LDLC	TG	rs17145750	rs17145750	A	0.1972	0.304	0.5164	-+-+---	0	5.226	0.5152	0.4988	0.4009	0.2134	+-+-	19.4	3.721	0.2932	-0.126029	0.559756	0.821862	1.6595	0.990187	0.0937494	-2.0322	1.77362	0.251881	0.523068	0.485452	0.281262	-0.429588	1.03345	0.677642	-0.563988	1.59233	0.723196	-0.145337	1.17882	0.901877
LDLC	TG	rs6967028	rs6967028	G	0.0303	0.3847	0.9373	+--+-++	68.3	18.907	0.004324	-0.0485	0.5176	0.9253	--++	77.8	13.494	0.003682	0.572944	0.68143	0.400462	-2.49094	1.18733	0.0359101	-5.4344	2.19415	0.013258	1.12407	0.649555	0.0835381	-2.18884	1.23714	0.0768478	2.6868	2.16696	0.215015	0.134309	1.4927	0.928305
LDLC	TG	rs11760752	rs11760752	A	0.3744	0.2796	0.1806	+--++-+	0	3.535	0.7393	0.3123	0.3548	0.3788	--++	0	1.853	0.6034	0.680935	0.537845	0.205498	-0.23835	0.932861	0.798333	-1.56078	1.694	0.356863	0.534221	0.424462	0.208181	0.515172	0.955188	0.589651	-1.40992	1.55888	0.365759	0.389185	1.13556	0.731804
LDLC	HDLC	rs1051921	rs1051921	A	0.0186	0.2747	0.946	-+-+---	21.2	7.614	0.2678	0.3011	0.3606	0.4038	+-+-	50.6	6.078	0.1079	-0.380672	0.503369	0.4495	1.95307	0.889169	0.0280555	-2.2555	1.67852	0.17903	0.158455	0.440421	0.719011	-0.470593	0.936887	0.615461	-0.0624901	1.44887	0.965598	-0.188682	1.04757	0.857063
LDLC	HDLC	rs17145750	rs17145750	A	0.4118	0.3023	0.1732	++-+---	5.8	6.367	0.3833	0.6775	0.3943	0.08578	+-+-	38.6	4.885	0.1804	0.237204	0.558476	0.67103	2.06154	0.982147	0.0358156	-1.97323	1.76987	0.264891	0.698208	0.482354	0.147757	-0.379677	1.02797	0.71187	-0.522433	1.58862	0.742261	-0.268781	1.16533	0.817588
LDLC	HDLC	rs6967028	rs6967028	G	-0.1709	0.3831	0.6556	+--+-+-	66.9	18.139	0.005894	-0.2015	0.5168	0.6966	--+-	77.9	13.586	0.003526	0.240226	0.677436	0.722881	-2.6314	1.17939	0.0256706	-5.56096	2.1927	0.0112088	0.989222	0.645904	0.125638	-2.23381	1.23654	0.0708404	2.37948	2.18312	0.275737	-0.109273	1.49356	0.941677
LDLC	HDLC	rs11760752	rs11760752	A	0.3618	0.2786	0.1941	+--++-+	0	3.656	0.7231	0.3056	0.3548	0.3891	--++	0	1.844	0.6054	0.657589	0.536806	0.220574	-0.218925	0.926036	0.813114	-1.59919	1.69082	0.344248	0.49844	0.422184	0.237753	0.558952	0.953536	0.557748	-1.4977	1.54722	0.333048	0.532419	1.14304	0.641364
LDLC	TC	rs1051921	rs1051921	A	0.7656	0.1261	1.267e-09	+++++++	27.8	8.309	0.2163	0.677	0.1611	2.639e-05	++++	32.6	4.452	0.2166	0.772579	0.238281	0.00118567	1.31474	0.353243	0.000197724	0.166309	0.809797	0.837282	0.552711	0.202121	0.00624659	0.771121	0.46283	0.0956934	1.91954	0.607123	0.0015685	0.364861	0.508111	0.472712
LDLC	TC	rs17145750	rs17145750	A	0.854	0.1374	5.161e-10	+++++++	0	3.891	0.6915	0.8494	0.1764	1.477e-06	++++	0	2.527	0.4705	0.784719	0.261022	0.00264423	1.22394	0.376344	0.00114519	0.51916	0.856353	0.544352	0.853059	0.22128	0.000115682	0.712058	0.507506	0.160601	1.55907	0.659365	0.0180543	0.178061	0.555726	0.748657
LDLC	TC	rs6967028	rs6967028	G	0.1491	0.1741	0.3918	++---++	38.8	9.797	0.1335	0.0403	0.2319	0.862	+--+	0	2.59	0.4593	0.367507	0.315006	0.243345	0.193996	0.487863	0.690892	-0.769896	1.06522	0.469829	-0.132104	0.297464	0.656969	-0.665971	0.583312	0.253576	2.11483	0.922455	0.0218704	0.847657	0.644041	0.188123
LDLC	TC	rs11760752	rs11760752	A	-0.1738	0.1257	0.1667	--+----	0	3.411	0.7558	-0.2114	0.1552	0.1732	-+--	4.4	3.138	0.3708	-0.095785	0.254326	0.706454	-0.528643	0.377849	0.161788	0.915186	0.816465	0.262325	-0.142957	0.193977	0.461136	-0.0425817	0.434541	0.921938	-0.263658	0.720754	0.714508	-0.482146	0.426086	0.257814
TC	NO	rs1051921	rs1051921	A	-1.1384	0.301	0.0001558	-+-----	15.3	7.08	0.3135	-0.6977	0.3914	0.07463	+---	21	3.799	0.2839	-1.70048	0.553068	0.00210766	0.603721	0.947073	0.523825	-3.23611	1.88332	0.0857423	-0.854255	0.483158	0.0770497	-1.71704	1.04663	0.100894	-2.47517	1.64122	0.131522	-0.771433	1.11687	0.489748
TC	NO	rs17145750	rs17145750	A	-0.8491	0.3317	0.01047	-+-----	0	5.366	0.4979	-0.5459	0.4322	0.2066	+---	13.3	3.46	0.326	-1.06154	0.611386	0.0825131	0.746982	1.05589	0.479292	-3.30404	1.98666	0.0962907	-0.653976	0.529277	0.216606	-1.54834	1.16298	0.183072	-2.58876	1.81572	0.153941	-0.684978	1.23886	0.580326
TC	NO	rs6967028	rs6967028	G	-0.0911	0.4211	0.8287	+--+-+-	72.5	21.822	0.001304	-0.0338	0.5564	0.9516	--+-	84.9	19.928	0.0001757	0.265817	0.760844	0.72681	-3.15189	1.23328	0.0105976	-6.18397	2.46899	0.012257	1.7879	0.708868	0.0116627	-1.83344	1.37631	0.182814	0.572496	2.55978	0.823029	-1.34038	1.54173	0.384629
TC	NO	rs11760752	rs11760752	A	0.6567	0.3041	0.03079	++-++-+	12.3	6.843	0.3356	0.6447	0.3862	0.09505	+-++	42.7	5.233	0.1555	0.929065	0.584953	0.112225	0.312058	0.971588	0.748071	-3.42541	1.89946	0.071331	0.866052	0.463627	0.0617632	0.678178	1.04439	0.51611	-1.35871	1.69399	0.422507	1.29666	1.2505	0.299777
TC	TG	rs1051921	rs1051921	A	0.0439	0.2904	0.8799	-+-+---	2.7	6.167	0.4048	0.3257	0.3768	0.3875	+-+-	35.9	4.682	0.1966	-0.38185	0.532196	0.473066	1.75682	0.917182	0.0554353	-2.09381	1.80219	0.245311	0.253134	0.461839	0.583623	-0.170353	1.04122	0.870039	-0.714115	1.5821	0.651722	-0.390429	1.10494	0.723828
TC	TG	rs17145750	rs17145750	A	0.5164	0.3202	0.1068	++-++--	5	6.319	0.3884	0.7525	0.4169	0.07104	+-+-	38.4	4.873	0.1813	0.35676	0.591509	0.546418	2.11162	1.02203	0.0388186	-2.12884	1.89713	0.261806	0.808525	0.506216	0.110222	0.0233919	1.1479	0.983742	-1.1055	1.73737	0.524576	-0.327758	1.22258	0.788633
TC	TG	rs6967028	rs6967028	G	-0.6434	0.4029	0.1103	---+-+-	64.1	16.723	0.01036	-0.6573	0.5368	0.2207	--+-	78.6	14.05	0.002837	-0.192161	0.713898	0.787798	-3.18492	1.20171	0.00804144	-6.3525	2.35021	0.00687286	0.659941	0.67721	0.329809	-2.57157	1.35572	0.0578502	0.48092	2.44826	0.844271	-0.81047	1.52102	0.594139
TC	TG	rs11760752	rs11760752	A	0.4695	0.2926	0.1087	++-++-+	0	4.583	0.5983	0.4237	0.3715	0.254	+-++	0	2.46	0.4826	0.703422	0.561125	0.20999	0.1174	0.946006	0.901236	-2.17585	1.8195	0.231754	0.574241	0.44261	0.194494	0.88115	1.03323	0.393764	-1.72201	1.6462	0.295539	0.972731	1.22091	0.425612
TC	HDLC	rs1051921	rs1051921	A	-1.4135	0.2977	2.056e-06	-+-----	17.3	7.257	0.2977	-1.0058	0.3896	0.009835	+---	31.6	4.388	0.2225	-1.87404	0.548344	0.000631679	0.378099	0.941961	0.688129	-3.59402	1.86119	0.0534785	-1.23548	0.479413	0.00996407	-2.11364	1.00845	0.0360882	-2.66183	1.61665	0.0996577	-0.765918	1.10173	0.486931
TC	HDLC	rs17145750	rs17145750	A	-1.1729	0.328	0.0003484	-+-----	0	5.07	0.5349	-0.903	0.4308	0.03607	+---	9.9	3.331	0.3434	-1.2894	0.605586	0.0332401	0.357808	1.04904	0.733042	-3.52401	1.96378	0.0727328	-1.05981	0.525116	0.0435655	-2.0081	1.11918	0.0727715	-2.72295	1.7887	0.127934	-0.755591	1.2259	0.537661
TC	HDLC	rs6967028	rs6967028	G	0.1915	0.4181	0.6469	+--+-+-	72.7	22.014	0.001204	0.2768	0.5521	0.6161	--+-	85	20.062	0.0001648	0.482482	0.756222	0.523463	-2.9079	1.23371	0.0184219	-5.65193	2.43885	0.0204786	2.07666	0.703318	0.00315046	-1.54347	1.34345	0.250602	1.43336	2.4881	0.564557	-1.12671	1.56215	0.470753
TC	HDLC	rs11760752	rs11760752	A	0.6859	0.3014	0.02285	++-++-+	8.4	6.547	0.3648	0.7017	0.3853	0.0686	+-++	42.3	5.198	0.1578	0.939777	0.581686	0.106179	0.224425	0.970227	0.817072	-3.23941	1.87468	0.083991	0.985183	0.459852	0.0321619	0.463526	1.02227	0.65024	-1.11307	1.67971	0.507553	1.12462	1.225	0.35859
TC	LDLC	rs1051921	rs1051921	A	-0.969	0.1377	1.986e-12	-------	11.8	6.799	0.3398	-0.7938	0.1765	6.876e-06	----	0	1.246	0.7421	-1.10489	0.261104	2.3201e-05	-1.14907	0.375508	0.00221315	-0.881966	0.910772	0.332859	-0.710954	0.220433	0.00125861	-1.12784	0.517547	0.029316	-2.39011	0.691545	0.000547872	-0.544783	0.546863	0.319155
TC	LDLC	rs17145750	rs17145750	A	-0.9824	0.1504	6.403e-11	-------	0	3.216	0.7813	-0.9148	0.1905	1.56e-06	----	0	1.123	0.7716	-0.966409	0.285576	0.000714201	-1.0374	0.404155	0.0102629	-1.25951	0.963163	0.19098	-0.943713	0.241384	9.24504e-05	-1.02869	0.572876	0.0725501	-2.04976	0.759306	0.00694394	-0.357789	0.594663	0.547396
TC	LDLC	rs6967028	rs6967028	G	-0.1761	0.1899	0.3536	---++--	43.4	10.606	0.1013	-0.0895	0.2459	0.716	--+-	58	7.141	0.06753	-0.280926	0.351505	0.42417	-0.760189	0.505815	0.132865	-0.69254	1.1986	0.563405	0.45472	0.3244	0.160997	0.274003	0.637962	0.667562	-2.00018	1.10224	0.0695774	-1.11495	0.667148	0.094678
TC	LDLC	rs11760752	rs11760752	A	0.324	0.1367	0.01778	++-++++	4.1	6.254	0.3953	0.3639	0.1691	0.03141	+-++	49.6	5.95	0.1141	0.309899	0.277737	0.264508	0.564334	0.394096	0.152153	-1.67263	0.917359	0.068256	0.326008	0.211627	0.123443	0.196415	0.472444	0.677598	0.0173254	0.784737	0.982386	0.775451	0.47148	0.100028
Abbreviation	Meaning
ARIC	= the Atherosclerosis Risk in Communities study
CHS	= Cardiovascular Health Study
FHS_C1	= Framingham Heart Study parental cohorts
FHS_C2	= Framingham Heart Study offspring cohorts
MESA	= Multi-Ethnic Study of Atherosclerosis
WHI	= Women’s Health Initiative
LLFS	= Long Life Family Study
UKB	= UK Biobank
META	= results of meta-analysis of US-based cohorts
CHD sample = ARIC+CHS+FHS_C1+FHS_C2+MESA+WHI+LLFS
AD sample = CHS+FHS_C1+FHS_C2+LLFS
SNP	= single nucleotide polymorphism
SNP1	= first SNP
SNP2	= second SNP
EA	= effect allele
NO	= basic adjustment
AD	= Alzheimer's disease
CHD	= coronary heart disease
HDL-C	= high-density lipoprotein cholesterol
LDL-C	= low-density lipoprotein cholesterol
TC	= total cholesterol
TG	= triglycerides
BETA	= effect size
SE	= standard error
P	= p-value
Direction	= visualization of sign-directions in selected cohorts referring to positive-sign direction (+), negative-sign direction (-), and not available value (?) of the effect size.

## Sheet: Notes
Abbreviation	Meaning
ARIC	= the Atherosclerosis Risk in Communities study
CHS	= Cardiovascular Health Study
FHS_C1	= Framingham Heart Study parental cohorts
FHS_C2	= Framingham Heart Study offspring cohorts
MESA	= Multi-Ethnic Study of Atherosclerosis
WHI	= Women’s Health Initiative
LLFS	= Long Life Family Study
UKB	= UK Biobank
META	= results of meta-analysis of US-based cohorts
CHD sample	= ARIC+CHS+FHS_C1+FHS_C2+MESA+WHI+LLFS
AD sample	= CHS+FHS_C1+FHS_C2+LLFS
SNP	= single nucleotide polymorphism
SNP1	= first SNP
SNP2	= second SNP
EA	= effect allele
NO	= basic adjustment
AD	= Alzheimer's disease
CHD	= coronary heart disease
HDL-C	= high-density lipoprotein cholesterol
LDL-C	= low-density lipoprotein cholesterol
TC	= total cholesterol
TG	= triglycerides
BETA	= effect size
SE	= standard error
P	= p-value
Direction	= visualization of sign-directions in selected cohorts referring to positive-sign direction (+), negative-sign direction (-), and not available value (?) of the effect size.
