# Supplementary material for: Exogenous exposures shape genetic predisposition to lipids, Alzheimer’s, and coronary heart disease in the MLXIPL gene locus
Source: Aging (Albany NY). 2023 Apr 18;15(9):3249–72. doi: 10.18632/aging.204665 (PMC10449285; doi:10.18632/aging.204665)
Supplement: Supplementary Table 5B [file aging-15-204665-s008.xlsx]

## Sheet: Supplementary Table 5B
Supplementary Table 5B. Univariate conditional and unconditional associations of the SNPs from the MLXIPL gene locus with lipids in the US cohorts: models with two SNPs.
					META: CHD sample							META: AD sample							ARIC			CHS			FHS_C1			FHS_C2			MESA			WHI			LLFS
OUTCOME	SNP2	SNP1	coefName	EA	BETA	SE	P	Direction	HetISq	HetChiSq	HetPVal	BETA	SE	P	Direction	HetISq	HetChiSq	HetPVal	BETA	SE	P	BETA	SE	P	BETA	SE	P	BETA	SE	P	BETA	SE	P	BETA	SE	P	BETA	SE	P
TG	NO	rs1051921	rs1051921	A	-8.8986	0.6829	8.283e-39	-------	33.9	9.083	0.169	-8.3425	0.8785	2.163e-21	----	51.9	6.231	0.1009	-9.11668	1.3257	6.11825e-12	-9.49774	1.81189	1.58926e-07	-12.1504	4.92293	0.0135825	-9.10093	1.18405	1.51516e-14	-9.66074	2.22813	1.45225e-05	-14.1694	3.45502	4.11182e-05	-3.78301	2.08209	0.0692282
TG	NO	rs17145750	rs17145750	A	-10.2038	0.743	6.47e-43	-------	43	10.533	0.1039	-10.3789	0.9568	2.04e-27	----	70.5	10.182	0.01708	-9.699	1.44739	2.06929e-11	-11.2755	1.89007	2.43693e-09	-11.7276	5.22511	0.0248028	-11.9707	1.29643	2.61703e-20	-9.81864	2.47536	7.29216e-05	-11.6587	3.65723	0.0014333	-3.63247	2.32847	0.118754
TG	NO	rs6967028	rs6967028	G	3.7276	0.9545	9.417e-05	+++++--	71.1	20.753	0.002032	3.9632	1.2407	0.001401	+++-	85.2	20.325	0.0001453	3.21857	1.74643	0.0653375	0.243371	2.60004	0.925425	2.94835	6.51739	0.650994	9.21512	1.73541	1.09587e-07	4.3675	3.12333	0.162009	-0.102159	7.95288	0.989751	-3.89336	2.601	0.134427
TG	NO	rs11760752	rs11760752	A	1.5642	0.6899	0.02338	++-+-++	14.1	6.988	0.3219	1.9368	0.8592	0.02419	+-++	40.8	5.065	0.1671	1.61646	1.45229	0.265692	1.62954	1.9944	0.413895	-8.95352	4.97991	0.0721882	2.35571	1.13635	0.038168	-1.17808	2.14125	0.582194	2.91182	4.45464	0.513331	2.59206	1.85059	0.161314
TG	rs1051921	rs17145750	rs1051921	A	-3.7217	1.3091	0.004471	---+---	35.4	9.291	0.1579	-1.2332	1.7183	0.473	--+-	0	2.179	0.5361	-6.1145	2.39219	0.0105875	-2.83857	4.07008	0.485538	-11.2514	10.9842	0.305683	0.662453	2.2628	0.769707	-7.63303	4.14736	0.0657013	-19.6841	9.02319	0.0291462	-3.79632	3.66736	0.300593
TG	rs1051921	rs17145750	rs17145750	A	-6.472	1.4379	6.768e-06	-----+-	52.2	12.563	0.05053	-8.9571	1.8863	2.05e-06	---0	58.5	7.231	0.06487	-3.92549	2.62081	0.134182	-8.53064	4.31355	0.0479696	-1.0642	11.6434	0.927175	-12.6115	2.48035	3.68487e-07	-2.49053	4.63139	0.59075	6.98036	9.72107	0.472717	-0.000862451	4.18211	0.999835
TG	rs1051921	rs6967028	rs1051921	A	-8.6859	0.6902	2.593e-36	-------	25.4	8.046	0.2348	-8.0567	0.8935	1.933e-19	----	33	4.48	0.2141	-8.9455	1.34229	2.65786e-11	-9.53243	1.85676	2.83797e-07	-12.1276	4.99482	0.0151809	-8.4189	1.19632	1.9595e-12	-9.39659	2.2289	2.48894e-05	-14.5477	3.42318	2.13998e-05	-4.37608	2.09257	0.036506
TG	rs1051921	rs6967028	rs6967028	G	2.1317	0.9668	0.02745	+-+++--	71	20.665	0.002107	2.4985	1.2533	0.0462	-++-	85	19.941	0.0001746	1.35586	1.77402	0.444696	-1.68571	2.667	0.527345	0.175488	6.59109	0.978759	7.80523	1.75037	8.22689e-06	2.95206	3.10768	0.34215	-3.69021	9.13586	0.686267	-4.94923	2.61092	0.0580144
TG	rs1051921	rs11760752	rs1051921	A	-8.9565	0.7008	2.093e-37	-------	44.4	10.785	0.09525	-8.3253	0.9073	4.479e-20	----	62.6	8.026	0.04549	-9.24107	1.34514	6.42059e-12	-9.6241	1.86667	2.52602e-07	-15.4288	5.09438	0.00245697	-8.97307	1.21592	1.58666e-13	-10.3019	2.25108	4.7297e-06	-14.2706	3.91759	0.000269797	-3.38739	2.13551	0.11269
TG	rs1051921	rs11760752	rs11760752	A	-0.3314	0.7094	0.6404	---+--+	36.2	9.4	0.1523	0.156	0.8827	0.8597	--++	59.7	7.448	0.0589	-0.413363	1.47849	0.779796	-0.541558	2.05276	0.791919	-12.9068	5.13233	0.0119096	0.423746	1.16643	0.716392	-3.09622	2.15987	0.151709	-0.491032	6.0771	0.935601	1.85066	1.89641	0.329126
TG	rs17145750	rs6967028	rs17145750	A	-9.9595	0.7505	3.425e-40	-------	26	8.113	0.2299	-10.0803	0.9663	1.773e-25	----	61.2	7.724	0.05208	-9.52707	1.46216	7.23273e-11	-11.3298	1.92782	4.17728e-09	-11.6566	5.29773	0.0277862	-11.2664	1.30696	6.67907e-18	-9.52167	2.4772	0.000121182	-11.9219	3.75532	0.00150002	-4.19079	2.33305	0.0724517
TG	rs17145750	rs6967028	rs6967028	G	2.1727	0.9619	0.02389	+-+++--	69.1	19.413	0.00352	2.4457	1.2465	0.04975	-++-	84.1	18.874	0.0002903	1.57069	1.76575	0.37372	-1.68146	2.64566	0.525068	0.536745	6.59485	0.935133	7.58069	1.74432	1.38682e-05	3.10235	3.11161	0.318753	-2.52068	8.38214	0.763628	-4.7507	2.59862	0.067525
TG	rs17145750	rs11760752	rs11760752	A	-0.2375	0.7047	0.7361	---+-++	31.7	8.78	0.1863	0.1382	0.8801	0.8752	--++	57.3	7.027	0.07105	-0.19204	1.47387	0.896332	-0.405292	2.05758	0.843847	-12.449	5.12511	0.0151392	0.279439	1.15898	0.809472	-2.85773	2.15238	0.184275	1.08574	4.80191	0.821119	1.96732	1.90588	0.301962
TG	rs17145750	rs11760752	rs17145750	A	-10.2055	0.7583	2.756e-41	-------	45.8	11.075	0.0861	-10.295	0.9795	7.743e-26	----	72.3	10.814	0.01277	-9.75357	1.46613	2.87938e-11	-11.3902	1.95562	5.73304e-09	-14.938	5.38713	0.00555569	-11.6631	1.32317	1.20161e-18	-10.3999	2.49429	3.0528e-05	-11.4759	3.73506	0.00212288	-3.21962	2.39535	0.178912
TG	rs6967028	rs11760752	rs11760752	A	2.0077	0.6973	0.003987	++-+-++	17.4	7.264	0.2971	2.3673	0.8684	0.006412	+-++	46.3	5.59	0.1334	2.06355	1.46448	0.158815	1.70993	2.01499	0.396101	-8.81624	5.045	0.080547	3.22145	1.15196	0.00516586	-0.61425	2.16964	0.777091	2.99915	4.22708	0.478009	2.21827	1.88092	0.238259
TG	rs6967028	rs11760752	rs6967028	G	4.1498	0.9654	1.721e-05	++++++-	71.5	21.075	0.001779	4.4856	1.2571	0.0003595	+++-	85.5	20.69	0.0001221	3.61333	1.75893	0.0399483	0.719801	2.63294	0.784559	1.15579	6.60166	0.86102	9.90232	1.75672	1.7321e-08	4.21872	3.16584	0.182671	0.679568	7.78168	0.93041	-3.42586	2.65253	0.196515
HDLC	NO	rs1051921	rs1051921	A	0.9751	0.1284	3.148e-14	+++++++	19	7.408	0.2848	1.0911	0.1578	4.68e-12	++++	44.3	5.391	0.1453	0.713935	0.257371	0.00553801	0.652434	0.353511	0.0649528	1.18564	0.810482	0.1435	1.31472	0.188216	2.84495e-12	0.858603	0.55007	0.118548	0.54535	0.761644	0.473981	0.152847	0.603222	0.799971
HDLC	NO	rs17145750	rs17145750	A	1.1477	0.1411	4.167e-16	+++++++	0	5.335	0.5016	1.272	0.1749	3.566e-13	++++	7.6	3.248	0.3549	0.916812	0.284908	0.0012912	1.11085	0.395149	0.00493558	0.930742	0.84843	0.272634	1.44091	0.206146	2.75298e-12	0.988391	0.598261	0.0985131	0.420443	0.84002	0.616713	0.28509	0.650021	0.660962
HDLC	NO	rs6967028	rs6967028	G	-0.9095	0.1754	2.145e-07	-------	0	2.091	0.9111	-0.8855	0.2261	8.982e-05	----	0	0.883	0.8296	-0.926216	0.321148	0.00392565	-0.726705	0.480073	0.130092	-1.38039	1.05407	0.190336	-0.971655	0.279235	0.000501968	-0.650204	0.653575	0.319813	-2.01112	1.09233	0.0656032	-0.335148	0.79642	0.673888
HDLC	NO	rs11760752	rs11760752	A	-0.1073	0.1239	0.3868	-++-+-+	0	5.269	0.5097	-0.1773	0.1514	0.2415	++-+	5.8	3.183	0.3642	-0.0277062	0.24299	0.90922	0.26339	0.364487	0.469905	0.0901676	0.824177	0.912883	-0.348595	0.180884	0.0539582	0.527304	0.521008	0.311498	-0.600519	0.851433	0.480621	0.258206	0.53214	0.627519
HDLC	rs1051921	rs17145750	rs1051921	A	0.2663	0.2452	0.2774	+-++++-	7.5	6.484	0.3712	0.3193	0.2989	0.2854	-++-	50.5	6.063	0.1086	0.0522522	0.483529	0.913945	-0.910432	0.63764	0.153345	2.06142	1.88068	0.273034	0.708323	0.359964	0.0490957	0.358294	1.27027	0.777897	0.836667	1.37893	0.544017	-0.35024	1.15018	0.76074
HDLC	rs1051921	rs17145750	rs17145750	A	0.8924	0.2704	0.0009658	++-++-+	0	4.225	0.6462	0.9741	0.326	0.002805	+-++	13.1	3.454	0.3268	0.853285	0.536372	0.111644	2.01983	0.720395	0.00505074	-1.01344	1.96801	0.606583	0.78419	0.394518	0.046843	0.623144	1.38202	0.652066	-0.369101	1.53956	0.810529	0.619434	1.24308	0.618268
HDLC	rs1051921	rs6967028	rs1051921	A	0.9125	0.1299	2.122e-12	+++++++	31.8	8.791	0.1857	1.0636	0.1589	2.197e-11	++++	49.8	5.978	0.1127	0.604785	0.260734	0.0203652	0.549383	0.359114	0.126059	1.02695	0.823803	0.212543	1.2956	0.189969	9.09936e-12	0.808825	0.553291	0.143784	0.345053	0.776796	0.656898	0.115991	0.607139	0.84849
HDLC	rs1051921	rs6967028	rs6967028	G	-0.74	0.1775	3.05e-05	-------	0	1.757	0.9407	-0.6998	0.2273	0.002078	----	0	0.48	0.9232	-0.777048	0.326732	0.0173955	-0.602828	0.487026	0.2158	-1.13941	1.07111	0.287434	-0.749059	0.281584	0.0078103	-0.522279	0.657102	0.426717	-1.92219	1.11583	0.0849506	-0.307405	0.800201	0.70086
HDLC	rs1051921	rs11760752	rs1051921	A	0.9879	0.1318	6.643e-14	+++++++	0	5.673	0.4608	1.105	0.1594	4.148e-12	++++	24.3	3.961	0.2657	0.748425	0.263707	0.00453836	0.73104	0.364221	0.0447357	1.29853	0.840623	0.122414	1.27684	0.193288	3.95113e-11	1.00574	0.55543	0.0701813	0.445429	0.774768	0.565345	0.223455	0.626585	0.721374
HDLC	rs1051921	rs11760752	rs11760752	A	0.1095	0.1273	0.39	+++-+-+	0	3.679	0.72	0.068	0.1595	0.6699	++-+	0	1.82	0.6106	0.139147	0.249697	0.577346	0.427129	0.375825	0.255743	0.436188	0.853798	0.609436	-0.069101	0.185713	0.709829	0.704877	0.526058	0.180271	-0.486362	0.867882	0.575206	0.307338	0.554651	0.579503
HDLC	rs17145750	rs6967028	rs17145750	A	1.0759	0.1424	4.102e-14	+++++++	2.6	6.163	0.4052	1.2193	0.175	3.252e-12	++++	13.6	3.473	0.3242	0.801827	0.287816	0.00533792	1.03264	0.400332	0.00989535	0.755666	0.862097	0.380735	1.39987	0.20762	1.5573e-11	0.935665	0.600335	0.119098	0.211982	0.854419	0.804056	0.251044	0.653117	0.700698
HDLC	rs17145750	rs6967028	rs6967028	G	-0.7484	0.1769	2.334e-05	-------	0	1.952	0.9241	-0.7047	0.2263	0.001842	----	0	0.588	0.8992	-0.784816	0.326076	0.0160907	-0.59141	0.483568	0.221325	-1.21191	1.0712	0.257904	-0.76225	0.280724	0.00662146	-0.523365	0.655728	0.424787	-1.96796	1.11199	0.0767649	-0.294415	0.797749	0.712086
HDLC	rs17145750	rs11760752	rs11760752	A	0.1056	0.1266	0.4043	+++-+-+	0	4.529	0.6055	0.0504	0.1527	0.7414	++-+	0	2.568	0.4631	0.159047	0.248305	0.521827	0.496629	0.372519	0.182478	0.339273	0.851382	0.690264	-0.100665	0.184647	0.585633	0.706917	0.525765	0.178771	-0.547482	0.86008	0.524419	0.336379	0.554586	0.544156
HDLC	rs17145750	rs11760752	rs17145750	A	1.1546	0.144	1.088e-15	+++++++	0	4.007	0.6757	1.2687	0.1756	4.961e-13	++++	0	2.205	0.5309	0.951737	0.290506	0.00105237	1.24052	0.403643	0.00211695	1.01859	0.876889	0.2454	1.37643	0.210425	6.10212e-11	1.13342	0.604074	0.0606156	0.327242	0.847895	0.699536	0.36124	0.673976	0.59197
HDLC	rs6967028	rs11760752	rs11760752	A	-0.2238	0.1257	0.07511	-+--+-+	6.5	6.418	0.378	-0.2932	0.1524	0.05437	+--+	23.6	3.925	0.2696	-0.141241	0.246653	0.566896	0.20799	0.369746	0.573761	-0.0907221	0.83496	0.913477	-0.484442	0.183259	0.00820577	0.451644	0.532031	0.395934	-0.889899	0.870638	0.306723	0.226208	0.539044	0.674744
HDLC	rs6967028	rs11760752	rs6967028	G	-0.9484	0.1778	9.527e-08	-------	0	3.092	0.7973	-0.9435	0.2265	3.105e-05	----	0	1.372	0.7121	-0.949865	0.325989	0.00357067	-0.675854	0.484506	0.163036	-1.39953	1.06858	0.190294	-1.07969	0.282604	0.000133178	-0.541233	0.667523	0.417476	-2.24402	1.1185	0.0448262	-0.289813	0.806246	0.719252
LDLC	NO	rs1051921	rs1051921	A	-0.199	0.2758	0.4706	-+-----	23	7.788	0.2541	0.0806	0.3606	0.8232	+---	52.5	6.322	0.09696	-0.638943	0.504623	0.205449	1.82737	0.893493	0.0408348	-2.3867	1.67857	0.155065	-0.128797	0.442458	0.77098	-0.57371	0.939828	0.541569	-0.146717	1.45462	0.919659	-0.19142	1.0533	0.855792
LDLC	NO	rs17145750	rs17145750	A	0.1596	0.3033	0.5987	-+-+---	0	5.764	0.4502	0.4319	0.395	0.2742	+-+-	32.6	4.454	0.2165	-0.0945433	0.558921	0.865676	1.85542	0.985906	0.0598442	-2.0717	1.77085	0.242045	0.398136	0.484608	0.411325	-0.498635	1.03104	0.628652	-0.583622	1.59482	0.714404	-0.283941	1.17072	0.808365
LDLC	NO	rs6967028	rs6967028	G	0.0377	0.3848	0.9219	+--+-+-	68.6	19.124	0.00396	-0.0314	0.5181	0.9517	--+-	78.4	13.868	0.003091	0.562358	0.681017	0.408939	-2.49565	1.18666	0.0354582	-5.41334	2.194	0.0136121	1.1902	0.649639	0.0669363	-2.15574	1.23491	0.08087	2.68543	2.16864	0.215604	-0.0869879	1.50442	0.953891
LDLC	NO	rs11760752	rs11760752	A	0.3958	0.2798	0.1571	+--++-+	0	3.696	0.7177	0.3546	0.3551	0.318	--++	0	2.084	0.5552	0.676123	0.537829	0.208705	-0.266498	0.931136	0.774719	-1.58964	1.69268	0.347668	0.578596	0.424512	0.172892	0.506487	0.955859	0.596198	-1.40362	1.55888	0.367906	0.517452	1.14534	0.651422
LDLC	rs1051921	rs17145750	rs1051921	A	-1.2574	0.5251	0.01664	-+---+-	0	4.823	0.5667	-0.9496	0.7	0.1749	+---	0	2.813	0.4214	-2.13895	0.91113	0.0188956	1.28337	1.67377	0.443228	-3.17105	3.79538	0.403434	-1.55659	0.847	0.0660961	-0.832017	2.03561	0.682738	1.2811	2.76624	0.643279	-0.0810809	2.0861	0.968996
LDLC	rs1051921	rs17145750	rs17145750	A	1.3924	0.5799	0.01633	+++++--	0	2.478	0.8709	1.4186	0.7691	0.06512	+++-	0	0.891	0.8275	1.91467	1.01405	0.059006	0.709282	1.85614	0.702367	0.920061	4.00435	0.818274	1.88154	0.928408	0.0427004	0.310721	2.23167	0.889266	-1.80672	3.07	0.556191	-0.206587	2.34456	0.929786
LDLC	rs1051921	rs6967028	rs1051921	A	-0.1256	0.279	0.6526	-+-+-+-	29.2	8.479	0.2051	0.1729	0.3685	0.6388	+-+-	54.7	6.619	0.08509	-0.550757	0.512073	0.282131	1.63023	0.910437	0.0733576	-3.18885	1.69955	0.0606152	0.122922	0.446696	0.783178	-0.773239	0.940537	0.411006	0.135809	1.46438	0.926109	-0.207754	1.0712	0.846218
LDLC	rs1051921	rs6967028	rs6967028	G	0.0151	0.3897	0.969	+--+-+-	69	19.366	0.003589	0.0059	0.5265	0.9911	--+-	78.4	13.911	0.003029	0.456226	0.692545	0.510045	-2.11391	1.21189	0.0811058	-6.12808	2.22717	0.00593205	1.2018	0.655588	0.0667787	-2.27632	1.2372	0.0657833	2.73505	2.18556	0.210781	-0.136928	1.52951	0.928666
LDLC	rs1051921	rs11760752	rs1051921	A	-0.0857	0.2826	0.7617	-+-+---	29	8.445	0.2073	0.2058	0.3689	0.5769	+-+-	57	6.98	0.07254	-0.491948	0.517362	0.341667	1.88747	0.910961	0.0382699	-2.99111	1.73691	0.0850549	0.060571	0.454393	0.893955	-0.485803	0.955172	0.611031	-0.454757	1.51128	0.763484	-0.091391	1.07005	0.931937
LDLC	rs1051921	rs11760752	rs11760752	A	0.3829	0.287	0.1823	++-++-+	0	4.218	0.6472	0.3773	0.369	0.3065	+-++	0	2.74	0.4334	0.594093	0.552875	0.282575	0.160829	0.950961	0.8657	-2.36552	1.75354	0.177339	0.579546	0.436066	0.183838	0.425599	0.972628	0.661693	-1.49722	1.62067	0.355577	0.497317	1.1638	0.669145
LDLC	rs17145750	rs6967028	rs17145750	A	0.2408	0.3064	0.432	-+-+---	16.2	7.163	0.306	0.5431	0.4022	0.1768	+-+-	45.1	5.462	0.1409	-0.00503682	0.566429	0.992905	1.64447	1.00132	0.100527	-2.88671	1.79206	0.107216	0.675433	0.488138	0.166452	-0.711489	1.03273	0.490863	-0.311822	1.61021	0.846448	-0.296733	1.19247	0.803486
LDLC	rs17145750	rs6967028	rs6967028	G	0.0687	0.3886	0.8598	+--+-+-	70.1	20.093	0.002666	0.0632	0.5206	0.9034	--+-	79.6	14.732	0.00206	0.56136	0.689999	0.415894	-2.24984	1.2021	0.0612622	-6.01651	2.2256	0.00686498	1.289	0.653395	0.0485209	-2.25772	1.23884	0.0683878	2.62264	2.1908	0.231261	-0.111045	1.53071	0.942168
LDLC	rs17145750	rs11760752	rs11760752	A	0.4207	0.2855	0.1406	+--++-+	0	4.586	0.598	0.4287	0.3631	0.2377	--++	0	2.918	0.4044	0.640494	0.551495	0.245489	-0.0667012	0.946404	0.943813	-2.20692	1.74667	0.206408	0.686935	0.433446	0.113007	0.455516	0.968178	0.638006	-1.53991	1.5904	0.332917	0.426152	1.15503	0.712162
LDLC	rs17145750	rs11760752	rs17145750	A	0.2521	0.3093	0.4151	++-+---	8.5	6.561	0.3634	0.5104	0.4022	0.2044	+-+-	42.3	5.204	0.1575	0.0710701	0.571795	0.901083	1.87961	1.002	0.0606743	-2.63639	1.82598	0.148791	0.531699	0.494645	0.282415	-0.406055	1.04346	0.697169	-0.844823	1.62708	0.603603	-0.203693	1.1841	0.863419
LDLC	rs6967028	rs11760752	rs11760752	A	0.4162	0.2829	0.1412	+--++-+	0	5.459	0.4864	0.3616	0.3615	0.3172	--++	26	4.057	0.2554	0.771515	0.543938	0.156077	-0.551254	0.941679	0.558282	-2.3314	1.70951	0.172635	0.702523	0.430203	0.102468	0.231112	0.966739	0.811057	-1.09369	1.58646	0.490578	0.520645	1.13522	0.6465
LDLC	rs6967028	rs11760752	rs6967028	G	0.1202	0.3888	0.7572	+--+-++	70.1	20.049	0.002715	0.0305	0.5239	0.9535	--++	80.1	15.064	0.001762	0.722826	0.688177	0.293558	-2.42827	1.20039	0.0430832	-5.90652	2.22114	0.00783183	1.29532	0.657833	0.0489454	-2.09962	1.24929	0.0928301	2.39763	2.21169	0.278333	0.0290204	1.48643	0.984423
TC	NO	rs1051921	rs1051921	A	-1.1384	0.301	0.0001558	-+-----	15.3	7.08	0.3135	-0.6977	0.3914	0.07463	+---	21	3.799	0.2839	-1.70048	0.553068	0.00210766	0.603721	0.947073	0.523825	-3.23611	1.88332	0.0857423	-0.854255	0.483158	0.0770497	-1.71704	1.04663	0.100894	-2.47517	1.64122	0.131522	-0.771433	1.11687	0.489748
TC	NO	rs17145750	rs17145750	A	-0.8491	0.3317	0.01047	-+-----	0	5.366	0.4979	-0.5459	0.4322	0.2066	+---	13.3	3.46	0.326	-1.06154	0.611386	0.0825131	0.746982	1.05589	0.479292	-3.30404	1.98666	0.0962907	-0.653976	0.529277	0.216606	-1.54834	1.16298	0.183072	-2.58876	1.81572	0.153941	-0.684978	1.23886	0.580326
TC	NO	rs6967028	rs6967028	G	-0.0911	0.4211	0.8287	+--+-+-	72.5	21.822	0.001304	-0.0338	0.5564	0.9516	--+-	84.9	19.928	0.0001757	0.265817	0.760844	0.72681	-3.15189	1.23328	0.0105976	-6.18397	2.46899	0.012257	1.7879	0.708868	0.0116627	-1.83344	1.37631	0.182814	0.572496	2.55978	0.823029	-1.34038	1.54173	0.384629
TC	NO	rs11760752	rs11760752	A	0.6567	0.3041	0.03079	++-++-+	12.3	6.843	0.3356	0.6447	0.3862	0.09505	+-++	42.7	5.233	0.1555	0.929065	0.584953	0.112225	0.312058	0.971588	0.748071	-3.42541	1.89946	0.071331	0.866052	0.463627	0.0617632	0.678178	1.04439	0.51611	-1.35871	1.69399	0.422507	1.29666	1.2505	0.299777
TC	rs1051921	rs17145750	rs1051921	A	-1.8724	0.5773	0.001181	-------	0	3.379	0.76	-1.0785	0.756	0.1537	----	0	0.345	0.9514	-3.30381	1.02741	0.0013014	-0.222714	1.74471	0.898425	-2.15603	4.25548	0.612402	-1.24347	0.92351	0.178155	-2.04173	2.24642	0.363414	-1.75247	2.93685	0.550696	-1.25989	2.33915	0.590157
TC	rs1051921	rs17145750	rs17145750	A	0.9655	0.6379	0.1301	++-++-+	0	1.717	0.9438	0.5761	0.8334	0.4894	+-++	0	0.24	0.9708	2.03663	1.1402	0.0740669	1.08642	1.95265	0.57795	-1.26846	4.48991	0.77755	0.540762	1.01226	0.593193	0.399319	2.49071	0.872627	-0.91449	3.29563	0.781408	0.517334	2.60801	0.84276
TC	rs1051921	rs6967028	rs1051921	A	-1.0889	0.3049	0.0003544	-+-----	29.2	8.477	0.2052	-0.5929	0.3997	0.138	+---	32.4	4.44	0.2177	-1.68612	0.560629	0.00263367	0.300721	0.965724	0.7555	-4.14565	1.90508	0.0295478	-0.517058	0.487714	0.28907	-1.90556	1.04928	0.0693604	-2.47703	1.65442	0.134336	-0.959717	1.15221	0.40488
TC	rs1051921	rs6967028	rs6967028	G	-0.2854	0.4267	0.5036	---+---	73.1	22.32	0.001059	-0.1274	0.5668	0.8222	--+-	85.2	20.218	0.0001529	-0.0534761	0.773093	0.944853	-3.02512	1.25805	0.0161896	-7.10499	2.50526	0.00456776	1.69146	0.715189	0.0180272	-2.11944	1.37824	0.124101	-0.0180702	2.58541	0.994423	-1.57214	1.58857	0.322342
TC	rs1051921	rs11760752	rs1051921	A	-1.0192	0.3085	0.0009536	-+-----	36.7	9.478	0.1484	-0.5574	0.405	0.1688	+---	47.3	5.693	0.1275	-1.55088	0.566484	0.00618659	0.715759	0.965235	0.458367	-4.42492	1.94781	0.0231019	-0.647137	0.496327	0.192284	-1.64088	1.06334	0.122797	-2.89302	1.69926	0.0886583	-0.521546	1.14355	0.648334
TC	rs1051921	rs11760752	rs11760752	A	0.4429	0.3119	0.1556	++-++-+	35.4	9.295	0.1576	0.5045	0.4007	0.208	+-++	58.2	7.169	0.06671	0.618035	0.600815	0.303639	0.472887	0.991735	0.633484	-4.59265	1.96799	0.0196129	0.716097	0.476201	0.132641	0.368571	1.06184	0.728511	-2.03339	1.75355	0.24622	1.1826	1.28001	0.355538
TC	rs17145750	rs6967028	rs17145750	A	-0.7914	0.3353	0.01827	-+-----	13.6	6.943	0.3262	-0.4251	0.4347	0.3281	+---	32.5	4.442	0.2175	-1.04985	0.619027	0.0898906	0.451106	1.07218	0.673947	-4.24447	2.0089	0.0346153	-0.301287	0.533165	0.572011	-1.74603	1.16595	0.134258	-2.58339	1.83568	0.159333	-0.858413	1.275	0.500779
TC	rs17145750	rs6967028	rs6967028	G	-0.2226	0.4256	0.6009	+--+-+-	74.1	23.177	0.0007395	-0.0841	0.5608	0.8808	--+-	85.9	21.268	9.261e-05	0.0862177	0.770514	0.910906	-3.14805	1.2525	0.0119571	-7.06469	2.50313	0.00476737	1.74775	0.713125	0.0142529	-2.07244	1.37893	0.132855	0.0515673	2.5894	0.984111	-1.49525	1.58582	0.345736
TC	rs17145750	rs11760752	rs11760752	A	0.5086	0.3104	0.1013	++-++-+	34.3	9.138	0.166	0.5488	0.3944	0.1641	+-++	58.1	7.152	0.0672	0.729469	0.600043	0.224102	0.344266	0.988211	0.72756	-4.48438	1.95994	0.0221363	0.795228	0.473399	0.0929914	0.453461	1.05621	0.667685	-1.82472	1.7198	0.288686	1.17301	1.26727	0.354641
TC	rs17145750	rs11760752	rs17145750	A	-0.7323	0.3383	0.03044	-+-----	21.6	7.649	0.2649	-0.4352	0.4398	0.3224	+---	44.2	5.376	0.1463	-0.879347	0.625686	0.159899	0.877494	1.07164	0.41288	-4.46395	2.04712	0.0292132	-0.486454	0.540354	0.367987	-1.45609	1.17586	0.215596	-2.89724	1.84541	0.116422	-0.444012	1.26017	0.724581
TC	rs6967028	rs11760752	rs11760752	A	0.6558	0.3075	0.03293	+--++-+	37.2	9.556	0.1446	0.6336	0.3929	0.1068	--++	61.7	7.833	0.0496	0.9975	0.59079	0.0913311	-0.0101308	0.98495	0.991793	-4.2988	1.91555	0.0248222	1.00253	0.4697	0.0328102	0.449126	1.05439	0.670138	-1.32997	1.73051	0.442166	1.17671	1.24649	0.345162
TC	rs6967028	rs11760752	rs6967028	G	0.0424	0.4253	0.9205	+--+-+-	74.4	23.427	0.0006655	0.0887	0.5629	0.8748	--+-	86	21.393	8.725e-05	0.472204	0.76809	0.538702	-2.94032	1.24802	0.0184739	-7.0904	2.49604	0.004502	1.95063	0.71781	0.00657824	-1.72436	1.38943	0.214585	0.222452	2.61546	0.932219	-1.08952	1.53075	0.476618
Abbreviation	Meaning
ARIC	= the Atherosclerosis Risk in Communities study
CHS	= Cardiovascular Health Study
FHS_C1	= Framingham Heart Study parental cohorts
FHS_C2	= Framingham Heart Study offspring cohorts
MESA	= Multi-Ethnic Study of Atherosclerosis
WHI	= Women’s Health Initiative
LLFS	= Long Life Family Study
UKB	= UK Biobank
META	= results of meta-analysis of US-based cohorts
CHD sample = ARIC+CHS+FHS_C1+FHS_C2+MESA+WHI+LLFS
AD sample = CHS+FHS_C1+FHS_C2+LLFS
SNP	= single nucleotide polymorphism
SNP1	= first SNP
SNP2	= second SNP
EA	= effect allele
NO	= basic adjustment
AD	= Alzheimer's disease
CHD	= coronary heart disease
HDL-C	= high-density lipoprotein cholesterol
LDL-C	= low-density lipoprotein cholesterol
TC	= total cholesterol
TG	= triglycerides
BETA	= effect size
SE	= standard error
P	= p-value
Direction	= visualization of sign-directions in selected cohorts referring to positive-sign direction (+), negative-sign direction (-), and not available value (?) of the effect size.

## Sheet: Notes
Abbreviation	Meaning
ARIC	= the Atherosclerosis Risk in Communities study
CHS	= Cardiovascular Health Study
FHS_C1	= Framingham Heart Study parental cohorts
FHS_C2	= Framingham Heart Study offspring cohorts
MESA	= Multi-Ethnic Study of Atherosclerosis
WHI	= Women’s Health Initiative
LLFS	= Long Life Family Study
UKB	= UK Biobank
META	= results of meta-analysis of US-based cohorts
CHD sample	= ARIC+CHS+FHS_C1+FHS_C2+MESA+WHI+LLFS
AD sample	= CHS+FHS_C1+FHS_C2+LLFS
SNP	= single nucleotide polymorphism
SNP1	= first SNP
SNP2	= second SNP
EA	= effect allele
NO	= basic adjustment
AD	= Alzheimer's disease
CHD	= coronary heart disease
HDL-C	= high-density lipoprotein cholesterol
LDL-C	= low-density lipoprotein cholesterol
TC	= total cholesterol
TG	= triglycerides
BETA	= effect size
SE	= standard error
P	= p-value
Direction	= visualization of sign-directions in selected cohorts referring to positive-sign direction (+), negative-sign direction (-), and not available value (?) of the effect size.
