# Supplementary material for: Exogenous exposures shape genetic predisposition to lipids, Alzheimer’s, and coronary heart disease in the MLXIPL gene locus
Source: Aging (Albany NY). 2023 Apr 18;15(9):3249–72. doi: 10.18632/aging.204665 (PMC10449285; doi:10.18632/aging.204665)
Supplement: Supplementary Table 5C [file aging-15-204665-s009.xlsx]

## Sheet: Supplementary Table 5C
Supplementary Table 5C. Univariate conditional and unconditional associations of the SNPs from the MLXIPL gene locus with lipids in the UK biobank: adjustment by additional phenotype.
					UKB
OUTCOME	Adjustment	SNP	coefName	EA	BETA	SE	P
TG	NO	rs1051921	rs1051921	A	-8.61655	0.30221	8.37003e-179
TG	NO	rs17145750	rs17145750	T	-9.47166	0.325227	1.82611e-186
TG	NO	rs6967028	rs6967028	C	0.229914	0.451386	0.610506
TG	NO	rs11760752	rs11760752	A	1.88508	0.327342	8.47411e-09
TG	HDLC	rs1051921	rs1051921	A	-7.46753	0.277319	1.0451e-159
TG	HDLC	rs17145750	rs17145750	T	-8.31387	0.298585	1.26398e-170
TG	HDLC	rs6967028	rs6967028	C	0.00719933	0.41502	0.98616
TG	HDLC	rs11760752	rs11760752	A	1.61685	0.300058	7.10631e-08
TG	LDLC	rs1051921	rs1051921	A	-8.60157	0.29524	1.32404e-186
TG	LDLC	rs17145750	rs17145750	T	-9.46347	0.317694	5.59031e-195
TG	LDLC	rs6967028	rs6967028	C	0.261172	0.441509	0.554155
TG	LDLC	rs11760752	rs11760752	A	1.93015	0.320207	1.66182e-09
TG	TC	rs1051921	rs1051921	A	-8.51065	0.294936	4.27049e-183
TG	TC	rs17145750	rs17145750	T	-9.35089	0.317327	7.4789e-191
TG	TC	rs6967028	rs6967028	C	0.304241	0.440337	0.489612
TG	TC	rs11760752	rs11760752	A	1.90964	0.319538	2.28353e-09
HDLC	NO	rs1051921	rs1051921	A	0.509432	0.0557474	6.34959e-20
HDLC	NO	rs17145750	rs17145750	T	0.513182	0.0603687	1.88284e-17
HDLC	NO	rs6967028	rs6967028	C	-0.102994	0.0790073	0.192369
HDLC	NO	rs11760752	rs11760752	A	-0.116421	0.0572946	0.0421571
HDLC	TG	rs1051921	rs1051921	A	-0.09047	0.0513438	0.0780622
HDLC	TG	rs17145750	rs17145750	T	-0.146177	0.0556371	0.00860593
HDLC	TG	rs6967028	rs6967028	C	-0.0834659	0.07265	0.250607
HDLC	TG	rs11760752	rs11760752	A	0.0143582	0.0525351	0.784618
HDLC	LDLC	rs1051921	rs1051921	A	0.51027	0.0554258	3.37367e-20
HDLC	LDLC	rs17145750	rs17145750	T	0.5131	0.0600269	1.25425e-17
HDLC	LDLC	rs6967028	rs6967028	C	-0.0979844	0.0785058	0.211989
HDLC	LDLC	rs11760752	rs11760752	A	-0.110826	0.0569671	0.0517232
HDLC	TC	rs1051921	rs1051921	A	0.539111	0.0526378	1.28702e-24
HDLC	TC	rs17145750	rs17145750	T	0.547804	0.0570098	7.32933e-22
HDLC	TC	rs6967028	rs6967028	C	-0.0841278	0.0746465	0.259736
HDLC	TC	rs11760752	rs11760752	A	-0.108317	0.0542461	0.04585
LDLC	NO	rs1051921	rs1051921	A	-0.0128254	0.129584	0.921159
LDLC	NO	rs17145750	rs17145750	T	0.00437858	0.140626	0.975161
LDLC	NO	rs6967028	rs6967028	C	-0.0578515	0.184625	0.754017
LDLC	NO	rs11760752	rs11760752	A	-0.101936	0.134759	0.449389
LDLC	TG	rs1051921	rs1051921	A	0.725443	0.126846	1.0709e-08
LDLC	TG	rs17145750	rs17145750	T	0.817589	0.137664	2.86751e-09
LDLC	TG	rs6967028	rs6967028	C	-0.0791832	0.180591	0.661048
LDLC	TG	rs11760752	rs11760752	A	-0.263069	0.131871	0.0460546
LDLC	HDLC	rs1051921	rs1051921	A	-0.144523	0.128874	0.262104
LDLC	HDLC	rs17145750	rs17145750	T	-0.126703	0.139864	0.36499
LDLC	HDLC	rs6967028	rs6967028	C	-0.0303855	0.183444	0.868441
LDLC	HDLC	rs11760752	rs11760752	A	-0.0772162	0.133963	0.564346
LDLC	TC	rs1051921	rs1051921	A	0.183457	0.0382207	1.58705e-06
LDLC	TC	rs17145750	rs17145750	T	0.235598	0.0415456	1.42115e-08
LDLC	TC	rs6967028	rs6967028	C	0.0791557	0.0538814	0.141813
LDLC	TC	rs11760752	rs11760752	A	-0.0533659	0.0393269	0.174787
TC	NO	rs1051921	rs1051921	A	-0.273181	0.16751	0.102926
TC	NO	rs17145750	rs17145750	T	-0.318501	0.181628	0.0795003
TC	NO	rs6967028	rs6967028	C	-0.174749	0.239421	0.465462
TC	NO	rs11760752	rs11760752	A	-0.0657571	0.174477	0.706262
TC	TG	rs1051921	rs1051921	A	0.737295	0.163856	6.80628e-06
TC	TG	rs17145750	rs17145750	T	0.792928	0.177691	8.10507e-06
TC	TG	rs6967028	rs6967028	C	-0.206574	0.233536	0.3764
TC	TG	rs11760752	rs11760752	A	-0.287783	0.170367	0.0911823
TC	HDLC	rs1051921	rs1051921	A	-0.771568	0.158202	1.07648e-06
TC	HDLC	rs17145750	rs17145750	T	-0.819849	0.17155	1.76119e-06
TC	HDLC	rs6967028	rs6967028	C	-0.080308	0.226187	0.722551
TC	HDLC	rs11760752	rs11760752	A	0.0442328	0.165192	0.788879
TC	LDLC	rs1051921	rs1051921	A	-0.250136	0.0494039	4.1255e-07
TC	LDLC	rs17145750	rs17145750	T	-0.318742	0.0536549	2.83987e-09
TC	LDLC	rs6967028	rs6967028	C	-0.113544	0.0698593	0.104093
TC	LDLC	rs11760752	rs11760752	A	0.0602158	0.0509239	0.237021
Abbreviation	Meaning
ARIC	= the Atherosclerosis Risk in Communities study
CHS	= Cardiovascular Health Study
FHS_C1	= Framingham Heart Study parental cohorts
FHS_C2	= Framingham Heart Study offspring cohorts
MESA	= Multi-Ethnic Study of Atherosclerosis
WHI	= Women’s Health Initiative
LLFS	= Long Life Family Study
UKB	= UK Biobank
META	= results of meta-analysis of US-based cohorts
CHD sample = ARIC+CHS+FHS_C1+FHS_C2+MESA+WHI+LLFS
AD sample = CHS+FHS_C1+FHS_C2+LLFS
SNP	= single nucleotide polymorphism
SNP1	= first SNP
SNP2	= second SNP
EA	= effect allele
NO	= basic adjustment
AD	= Alzheimer's disease
CHD	= coronary heart disease
HDL-C	= high-density lipoprotein cholesterol
LDL-C	= low-density lipoprotein cholesterol
TC	= total cholesterol
TG	= triglycerides
BETA	= effect size
SE	= standard error
P	= p-value
Direction	= visualization of sign-directions in selected cohorts referring to positive-sign direction (+), negative-sign direction (-), and not available value (?) of the effect size.

## Sheet: Notes
Abbreviation	Meaning
ARIC	= the Atherosclerosis Risk in Communities study
CHS	= Cardiovascular Health Study
FHS_C1	= Framingham Heart Study parental cohorts
FHS_C2	= Framingham Heart Study offspring cohorts
MESA	= Multi-Ethnic Study of Atherosclerosis
WHI	= Women’s Health Initiative
LLFS	= Long Life Family Study
UKB	= UK Biobank
META	= results of meta-analysis of US-based cohorts
CHD sample	= ARIC+CHS+FHS_C1+FHS_C2+MESA+WHI+LLFS
AD sample	= CHS+FHS_C1+FHS_C2+LLFS
SNP	= single nucleotide polymorphism
SNP1	= first SNP
SNP2	= second SNP
EA	= effect allele
NO	= basic adjustment
AD	= Alzheimer's disease
CHD	= coronary heart disease
HDL-C	= high-density lipoprotein cholesterol
LDL-C	= low-density lipoprotein cholesterol
TC	= total cholesterol
TG	= triglycerides
BETA	= effect size
SE	= standard error
P	= p-value
Direction	= visualization of sign-directions in selected cohorts referring to positive-sign direction (+), negative-sign direction (-), and not available value (?) of the effect size.
