# Supplementary material for: Exogenous exposures shape genetic predisposition to lipids, Alzheimer’s, and coronary heart disease in the MLXIPL gene locus
Source: Aging (Albany NY). 2023 Apr 18;15(9):3249–72. doi: 10.18632/aging.204665 (PMC10449285; doi:10.18632/aging.204665)
Supplement: Supplementary Table 5D [file aging-15-204665-s010.xlsx]

## Sheet: Supplementary Table 5D
Supplementary Table 5D. Univariate conditional and unconditional associations of the SNPs from the MLXIPL gene locus with lipids in the UK biobank: models with two SNPs.
					UKB
OUTCOME	SNP2	SNP1	coefName	EA	BETA	SE	P
TG	NO	rs1051921	rs1051921	A	-3.95255	0.138629	8.37003e-179
TG	NO	rs17145750	rs17145750	T	-4.3448	0.149187	1.82611e-186
TG	NO	rs6967028	rs6967028	C	0.105465	0.207058	0.610506
TG	NO	rs11760752	rs11760752	A	0.864714	0.150157	8.47411e-09
TG	rs1051921	rs17145750	rs17145750	T	-2.58252	0.305131	2.59178e-17
TG	rs1051921	rs17145750	rs1051921	A	-1.89077	0.284019	2.79119e-11
TG	rs1051921	rs6967028	rs6967028	C	-0.736054	0.209442	0.000440835
TG	rs1051921	rs6967028	rs1051921	A	-4.02428	0.140465	1.61144e-180
TG	rs1051921	rs11760752	rs11760752	A	-0.0661335	0.154861	0.669342
TG	rs1051921	rs11760752	rs1051921	A	-3.95636	0.144177	8.88291e-166
TG	rs17145750	rs6967028	rs6967028	C	-0.667256	0.20895	0.00140619
TG	rs17145750	rs6967028	rs17145750	T	-4.40971	0.150681	2.88517e-188
TG	rs17145750	rs11760752	rs11760752	A	0.00805105	0.15432	0.958392
TG	rs17145750	rs11760752	rs17145750	T	-4.33926	0.15448	1.31804e-173
TG	rs6967028	rs11760752	rs11760752	A	0.895398	0.151884	3.74023e-09
TG	rs6967028	rs11760752	rs6967028	C	0.279563	0.210508	0.184165
HDLC	NO	rs1051921	rs1051921	A	0.509432	0.0557474	6.34959e-20
HDLC	NO	rs17145750	rs17145750	T	0.513182	0.0603687	1.88284e-17
HDLC	NO	rs6967028	rs6967028	C	-0.102994	0.0790073	0.192369
HDLC	NO	rs11760752	rs11760752	A	-0.116421	0.0572946	0.0421571
HDLC	rs1051921	rs17145750	rs17145750	T	0.147104	0.119625	0.218805
HDLC	rs1051921	rs17145750	rs1051921	A	0.394017	0.110575	0.000366166
HDLC	rs1051921	rs6967028	rs6967028	C	0.0015359	0.0798878	0.984661
HDLC	rs1051921	rs6967028	rs1051921	A	0.512672	0.0564044	9.9743e-20
HDLC	rs1051921	rs11760752	rs11760752	A	0.00396168	0.0588552	0.946333
HDLC	rs1051921	rs11760752	rs1051921	A	0.509953	0.0576444	9.0287e-19
HDLC	rs17145750	rs6967028	rs6967028	C	-0.0128408	0.0797936	0.872152
HDLC	rs17145750	rs6967028	rs17145750	T	0.514277	0.0609419	3.20584e-17
HDLC	rs17145750	rs11760752	rs11760752	A	-0.0124653	0.0586278	0.831625
HDLC	rs17145750	rs11760752	rs17145750	T	0.510843	0.0620853	1.90224e-16
HDLC	rs6967028	rs11760752	rs11760752	A	-0.132816	0.0580007	0.0220268
HDLC	rs6967028	rs11760752	rs6967028	C	-0.130808	0.0805108	0.104221
LDLC	NO	rs1051921	rs1051921	A	-0.0128254	0.129584	0.921159
LDLC	NO	rs17145750	rs17145750	T	0.00437858	0.140626	0.975161
LDLC	NO	rs6967028	rs6967028	C	-0.0578515	0.184625	0.754017
LDLC	NO	rs11760752	rs11760752	A	-0.101936	0.134759	0.449389
LDLC	rs1051921	rs17145750	rs17145750	T	0.111306	0.277928	0.688798
LDLC	rs1051921	rs17145750	rs1051921	A	-0.105044	0.2563	0.681918
LDLC	rs1051921	rs6967028	rs6967028	C	-0.0588597	0.186756	0.752633
LDLC	rs1051921	rs6967028	rs1051921	A	-0.0198558	0.131139	0.879652
LDLC	rs1051921	rs11760752	rs11760752	A	-0.106073	0.138484	0.443699
LDLC	rs1051921	rs11760752	rs1051921	A	-0.037489	0.13408	0.779783
LDLC	rs17145750	rs6967028	rs6967028	C	-0.052482	0.186584	0.778497
LDLC	rs17145750	rs6967028	rs17145750	T	0.000425222	0.141993	0.997611
LDLC	rs17145750	rs11760752	rs11760752	A	-0.0986364	0.137985	0.47471
LDLC	rs17145750	rs11760752	rs17145750	T	-0.0212205	0.144818	0.883501
LDLC	rs6967028	rs11760752	rs11760752	A	-0.113184	0.136379	0.406585
LDLC	rs6967028	rs11760752	rs6967028	C	-0.0559497	0.188149	0.766184
TC	NO	rs1051921	rs1051921	A	-0.273181	0.16751	0.102926
TC	NO	rs17145750	rs17145750	T	-0.318501	0.181628	0.0795003
TC	NO	rs6967028	rs6967028	C	-0.174749	0.239421	0.465462
TC	NO	rs11760752	rs11760752	A	-0.0657571	0.174477	0.706262
TC	rs1051921	rs17145750	rs17145750	T	-0.204438	0.360454	0.570599
TC	rs1051921	rs17145750	rs1051921	A	-0.112119	0.332699	0.736118
TC	rs1051921	rs6967028	rs6967028	C	-0.235014	0.242149	0.331781
TC	rs1051921	rs6967028	rs1051921	A	-0.295531	0.169511	0.0812585
TC	rs1051921	rs11760752	rs11760752	A	-0.130976	0.179361	0.465246
TC	rs1051921	rs11760752	rs1051921	A	-0.30278	0.173372	0.0807383
TC	rs17145750	rs6967028	rs6967028	C	-0.22925	0.241925	0.34333
TC	rs17145750	rs6967028	rs17145750	T	-0.338487	0.183383	0.0649225
TC	rs17145750	rs11760752	rs11760752	A	-0.120394	0.178701	0.50049
TC	rs17145750	rs11760752	rs17145750	T	-0.348699	0.187093	0.0623534
TC	rs6967028	rs11760752	rs11760752	A	-0.0903493	0.176558	0.608844
TC	rs6967028	rs11760752	rs6967028	C	-0.160521	0.243939	0.510516
Abbreviation	Meaning
ARIC	= the Atherosclerosis Risk in Communities study
CHS	= Cardiovascular Health Study
FHS_C1	= Framingham Heart Study parental cohorts
FHS_C2	= Framingham Heart Study offspring cohorts
MESA	= Multi-Ethnic Study of Atherosclerosis
WHI	= Women’s Health Initiative
LLFS	= Long Life Family Study
UKB	= UK Biobank
META	= results of meta-analysis of US-based cohorts
CHD sample = ARIC+CHS+FHS_C1+FHS_C2+MESA+WHI+LLFS
AD sample = CHS+FHS_C1+FHS_C2+LLFS
SNP	= single nucleotide polymorphism
SNP1	= first SNP
SNP2	= second SNP
EA	= effect allele
NO	= basic adjustment
AD	= Alzheimer's disease
CHD	= coronary heart disease
HDL-C	= high-density lipoprotein cholesterol
LDL-C	= low-density lipoprotein cholesterol
TC	= total cholesterol
TG	= triglycerides
BETA	= effect size
SE	= standard error
P	= p-value
Direction	= visualization of sign-directions in selected cohorts referring to positive-sign direction (+), negative-sign direction (-), and not available value (?) of the effect size.

## Sheet: Notes
Abbreviation	Meaning
ARIC	= the Atherosclerosis Risk in Communities study
CHS	= Cardiovascular Health Study
FHS_C1	= Framingham Heart Study parental cohorts
FHS_C2	= Framingham Heart Study offspring cohorts
MESA	= Multi-Ethnic Study of Atherosclerosis
WHI	= Women’s Health Initiative
LLFS	= Long Life Family Study
UKB	= UK Biobank
META	= results of meta-analysis of US-based cohorts
CHD sample	= ARIC+CHS+FHS_C1+FHS_C2+MESA+WHI+LLFS
AD sample	= CHS+FHS_C1+FHS_C2+LLFS
SNP	= single nucleotide polymorphism
SNP1	= first SNP
SNP2	= second SNP
EA	= effect allele
NO	= basic adjustment
AD	= Alzheimer's disease
CHD	= coronary heart disease
HDL-C	= high-density lipoprotein cholesterol
LDL-C	= low-density lipoprotein cholesterol
TC	= total cholesterol
TG	= triglycerides
BETA	= effect size
SE	= standard error
P	= p-value
Direction	= visualization of sign-directions in selected cohorts referring to positive-sign direction (+), negative-sign direction (-), and not available value (?) of the effect size.
