# Supplementary material for: Exogenous exposures shape genetic predisposition to lipids, Alzheimer’s, and coronary heart disease in the MLXIPL gene locus
Source: Aging (Albany NY). 2023 Apr 18;15(9):3249–72. doi: 10.18632/aging.204665 (PMC10449285; doi:10.18632/aging.204665)
Supplement: Supplementary Table 6A [file aging-15-204665-s011.xlsx]

## Sheet: Supplementary Table 6A
Supplementary Table 6A. Univariate unconditional and mediation analysis of the associations of the SNPs from the MLXIPL gene locus with AD and CHD in the US cohorts.
					META: CHD sample							META: AD sample							ARIC			CHS			FHS_C1			FHS_C2			MESA			WHI			LLFS
OUTCOME	MEDIATOR	SNP	EA	coefName	BETA	SE	P	Direction	HetISq	HetChiSq	HetPVal	BETA	SE	P	Direction	HetISq	HetChiSq	HetPVal	BETA	SE	P	BETA	SE	P	BETA	SE	P	BETA	SE	P	BETA	SE	P	BETA	SE	P	BETA	SE	P
AD	NO	rs1051921	A	rs1051921_A								-0.0184	0.0869	0.8323	+---	0	0.576	0.902				0.0444034	0.134052	0.740463	-0.132773	0.198312	0.503165	-0.0481614	0.19883	0.808606							-0.0120218	0.195918	0.951071
AD	NO	rs17145750	A	rs17145750_A								-0.1104	0.0927	0.2338	----	0	0.4	0.9402				-0.167679	0.147339	0.255101	-0.0319153	0.203887	0.875612	-0.0516734	0.204911	0.800906							-0.139472	0.211612	0.509835
AD	NO	rs6967028	G	rs6967028_G								0.0905	0.1134	0.4252	+-++	40.2	5.013	0.1709				0.0158128	0.171619	0.926588	-0.253833	0.266454	0.340777	0.105999	0.273848	0.698704							0.529492	0.247344	0.0322974
AD	NO	rs11760752	A	rs11760752_A								0.0313	0.0859	0.7158	+--+	0	1.54	0.6731				0.127451	0.133291	0.338978	-0.074193	0.178625	0.677882	-0.130008	0.211376	0.538519							0.0900496	0.197878	0.649054
AD	TG	rs1051921	A	IE								-0.0013	0.005	0.7912	++--	18.7	3.689	0.2971				0.0101874	0.00864542	0.238652	0.00303584	0.0131605	0.817565	-0.00742193	0.00907792	0.413597							-0.0141629	0.0110308	0.199164
AD	TG	rs1051921	A	DE								-0.0254	0.0913	0.7809	+--+	0	0.587	0.8995				0.0332035	0.142247	0.815434	-0.148245	0.194866	0.446804	-0.0359601	0.205894	0.861352							0.00319249	0.22033	0.988439
AD	TG	rs1051921	A	TOTAL								-0.0241	0.0903	0.7896	+---	0	0.635	0.8883				0.0433909	0.140324	0.757154	-0.145209	0.19365	0.453342	-0.0433821	0.202549	0.830406							-0.0109704	0.218995	0.960047
AD	TG	rs17145750	A	IE								-0.0035	0.0054	0.52	+---	10.5	3.352	0.3405				0.0112048	0.0100027	0.262636	-0.00477627	0.0172471	0.781832	-0.00806824	0.00892113	0.365785							-0.0143283	0.0112701	0.2036
AD	TG	rs17145750	A	DE								-0.1142	0.096	0.2344	----	0	0.421	0.9358				-0.178317	0.146654	0.224022	-0.0456986	0.208925	0.826859	-0.0348815	0.227036	0.877895							-0.120434	0.225443	0.593196
AD	TG	rs17145750	A	TOTAL								-0.1148	0.0955	0.2294	----	0	0.333	0.9537				-0.167112	0.145355	0.250275	-0.0504749	0.210581	0.810568	-0.0429497	0.224907	0.848552							-0.134762	0.224057	0.547532
AD	TG	rs6967028	G	IE								-0.0005	0.0037	0.8819	+++-	0	1.614	0.6562				1.3943e-05	0.00436313	0.99745	0.0111435	0.0286555	0.697366	0.00564228	0.0101804	0.579422							-0.0108022	0.00995346	0.277802
AD	TG	rs6967028	G	DE								0.0864	0.1181	0.4645	+-++	38.1	4.845	0.1835				0.0157167	0.177453	0.929425	-0.296928	0.293154	0.311121	0.0978793	0.267781	0.714723							0.540967	0.263578	0.0401311
AD	TG	rs6967028	G	TOTAL								0.0845	0.1182	0.4747	+-++	33.7	4.527	0.2099				0.0157307	0.176831	0.929115	-0.285784	0.293478	0.330164	0.103522	0.267777	0.699055							0.530165	0.267352	0.0473653
AD	TG	rs11760752	A	IE								0.0007	0.0027	0.8059	-+++	0	0.809	0.8473				-0.000549644	0.0035301	0.876268	0.00760926	0.0164691	0.644058	0.000133787	0.00533595	0.979997							0.0062009	0.00780535	0.426938
AD	TG	rs11760752	A	DE								0.0283	0.0922	0.759	+--+	0	1.408	0.7036				0.128172	0.142384	0.368021	-0.0813337	0.207689	0.695344	-0.130049	0.209513	0.534784							0.0827212	0.211209	0.695312
AD	TG	rs11760752	A	TOTAL								0.0302	0.0918	0.742	+--+	0	1.395	0.7067				0.127623	0.141881	0.368386	-0.0737244	0.206491	0.721066	-0.129915	0.207867	0.531976							0.0889221	0.211893	0.674738
AD	HDLC	rs1051921	A	IE								0.0007	0.0028	0.8109	++-+	0	0.652	0.8845				0.00285217	0.00472272	0.545894	0.00257111	0.0157794	0.870565	-0.00473148	0.0084367	0.574919							0.000215854	0.0038737	0.955563
AD	HDLC	rs1051921	A	DE								-0.0185	0.0907	0.8385	+---	0	0.548	0.9082				0.0422186	0.135806	0.755896	-0.133201	0.198487	0.502171	-0.0439393	0.220674	0.842174							-0.0118227	0.215801	0.95631
AD	HDLC	rs1051921	A	TOTAL								-0.0173	0.0904	0.8486	+---	0	0.559	0.9057				0.0450708	0.135415	0.73926	-0.130629	0.198343	0.510151	-0.0486707	0.221201	0.825848							-0.0116069	0.213687	0.956682
AD	HDLC	rs17145750	A	IE								0.0015	0.0034	0.6704	+--+	0	0.58	0.9011				0.00510096	0.00617609	0.408849	-0.0039329	0.0144785	0.7859	-0.000212629	0.00812642	0.979126							0.000321909	0.00504487	0.949122
AD	HDLC	rs17145750	A	DE								-0.1128	0.097	0.2449	----	0	0.376	0.9452				-0.170411	0.151808	0.261632	-0.0331778	0.20999	0.874459	-0.0513893	0.224664	0.819072							-0.138523	0.221647	0.53199
AD	HDLC	rs17145750	A	TOTAL								-0.1113	0.0972	0.2518	----	0	0.335	0.9533				-0.16531	0.152824	0.279384	-0.0371108	0.210009	0.859736	-0.0516019	0.2248	0.818445							-0.138201	0.220117	0.5301
AD	HDLC	rs6967028	G	IE								-0.0001	0.0036	0.9779	--+-	0	2.663	0.4466				-0.00269582	0.0051866	0.603227	-0.002105	0.0200477	0.916376	0.0211336	0.0137117	0.123248							-0.00046001	0.00560788	0.934623
AD	HDLC	rs6967028	G	DE								0.1023	0.113	0.3655	+-++	41.6	5.137	0.162				0.0222311	0.174671	0.898723	-0.243928	0.272561	0.370814	0.0734136	0.26623	0.782738							0.531553	0.236247	0.0244496
AD	HDLC	rs6967028	G	TOTAL								0.1034	0.1121	0.3563	+-++	42.4	5.208	0.1572				0.0195353	0.173007	0.910097	-0.246033	0.270268	0.362649	0.0945472	0.263721	0.71996							0.531093	0.235433	0.0240822
AD	HDLC	rs11760752	A	IE								0.0007	0.0026	0.7914	+--+	0	0.336	0.9531				0.00208409	0.00398125	0.600644	-0.00461665	0.0155067	0.765917	-0.00152898	0.00771228	0.842847							0.000241711	0.00386385	0.950119
AD	HDLC	rs11760752	A	DE								0.0381	0.0862	0.6584	+--+	0	1.467	0.6898				0.126112	0.127068	0.320965	-0.0675219	0.189508	0.721614	-0.12814	0.212039	0.54563							0.0906006	0.21025	0.666527
AD	HDLC	rs11760752	A	TOTAL								0.0378	0.0859	0.6603	+--+	0	1.535	0.6741				0.128196	0.126784	0.31195	-0.0721386	0.186779	0.699331	-0.129668	0.213255	0.543159							0.0908423	0.209934	0.665219
AD	LDLC	rs1051921	A	IE								0.0015	0.0026	0.5753	+++-	3.4	3.105	0.3757				0.00180823	0.00432579	0.675939	0.000337893	0.0176838	0.984755	0.0252858	0.0140434	0.0717749							-0.000147645	0.00345852	0.965948
AD	LDLC	rs1051921	A	DE								-0.0252	0.0929	0.786	+---	0	0.562	0.9051				0.0421964	0.141627	0.765749	-0.13246	0.206386	0.520999	-0.0796316	0.219288	0.716502							-0.0119808	0.213983	0.95535
AD	LDLC	rs1051921	A	TOTAL								-0.0204	0.0927	0.8256	+---	0	0.536	0.9109				0.0440046	0.141304	0.755483	-0.132122	0.202874	0.514884	-0.0543458	0.221311	0.80602							-0.0121285	0.214811	0.954974
AD	LDLC	rs17145750	A	IE								0.0015	0.0026	0.5633	+++-	0	2.972	0.3959				0.00194902	0.00416144	0.639532	4.78575e-05	0.0150971	0.997471	0.0261113	0.0148618	0.0789285							-5.15015e-05	0.00339221	0.987887
AD	LDLC	rs17145750	A	DE								-0.1235	0.0949	0.1928	----	0	0.329	0.9545				-0.169701	0.139927	0.225213	-0.0302331	0.213779	0.887536	-0.0863493	0.238754	0.717602							-0.139922	0.220302	0.525339
AD	LDLC	rs17145750	A	TOTAL								-0.1182	0.0945	0.2111	----	0	0.367	0.947				-0.167752	0.139864	0.230375	-0.0301853	0.212951	0.887279	-0.060238	0.23565	0.79824							-0.139973	0.21952	0.523714
AD	LDLC	rs6967028	G	IE								-0.0007	0.0036	0.8379	-+++	0	0.146	0.9858				-0.00236213	0.00573486	0.68042	0.000614634	0.0395654	0.987606	0.00179939	0.0137764	0.896081							0.00013076	0.00497586	0.979035
AD	LDLC	rs6967028	G	DE								0.1131	0.1169	0.333	+-++	28.7	4.207	0.2399				0.016511	0.181525	0.927527	-0.192741	0.289045	0.504888	0.104603	0.259829	0.687255							0.530306	0.249166	0.0333105
AD	LDLC	rs6967028	G	TOTAL								0.1113	0.1164	0.3389	+-++	29.6	4.261	0.2347				0.0141489	0.181127	0.937736	-0.192126	0.284935	0.500134	0.106402	0.259379	0.681645							0.530437	0.248773	0.0329894
AD	LDLC	rs11760752	A	IE								-0.0012	0.0026	0.6465	-+--	0	0.536	0.911				-0.00143222	0.00395096	0.71698	0.000142766	0.0119036	0.990431	-0.00778257	0.00993555	0.433448							-0.000107388	0.0038509	0.977753
AD	LDLC	rs11760752	A	DE								0.0416	0.0877	0.6352	+--+	0	1.448	0.6943				0.1293	0.128307	0.313582	-0.0755117	0.203417	0.710476	-0.122499	0.212834	0.564913							0.0904447	0.208247	0.66406
AD	LDLC	rs11760752	A	TOTAL								0.0397	0.0874	0.6499	+--+	0	1.504	0.6814				0.127867	0.127547	0.316095	-0.0753689	0.203815	0.711538	-0.130281	0.211081	0.537097							0.0903373	0.20883	0.665314
AD	TC	rs1051921	A	IE								0.0006	0.0021	0.7801	+++-	0	1.19	0.7554				0.000210166	0.00257888	0.935048	0.00133629	0.0144464	0.926301	0.0121585	0.0108681	0.263252							-0.000141192	0.00404931	0.972185
AD	TC	rs1051921	A	DE								-0.0226	0.0875	0.7963	+---	0	0.723	0.8679				0.0442305	0.128887	0.731468	-0.144326	0.189663	0.44668	-0.0667294	0.223182	0.764947							-0.0115554	0.211053	0.956337
AD	TC	rs1051921	A	TOTAL								-0.0209	0.0871	0.8104	+---	0	0.71	0.8709				0.0444407	0.128475	0.729411	-0.14299	0.186979	0.444427	-0.0545709	0.223536	0.807134							-0.0116966	0.210192	0.955623
AD	TC	rs17145750	A	IE								0.0008	0.0024	0.7521	+++-	0	1.059	0.7869				0.000380051	0.00301811	0.899792	0.00076086	0.0141977	0.957262	0.0105946	0.00995933	0.287426							-0.00041589	0.00450317	0.926416
AD	TC	rs17145750	A	DE								-0.1209	0.0962	0.2089	----	0	0.283	0.9631				-0.167939	0.145763	0.249266	-0.0463583	0.212117	0.827	-0.06882	0.235762	0.77036							-0.139013	0.219258	0.526071
AD	TC	rs17145750	A	TOTAL								-0.1189	0.0961	0.2159	----	0	0.307	0.9588				-0.167559	0.145664	0.250016	-0.0455974	0.210986	0.828897	-0.0582255	0.236838	0.805802							-0.139429	0.218374	0.523158
AD	TC	rs6967028	G	IE								-0.0031	0.0043	0.4681	----	0	0.076	0.9945				-0.00188549	0.00625437	0.763058	-0.00734779	0.0448822	0.869957	-0.00438381	0.00993677	0.659089							-0.00393287	0.00729663	0.589888
AD	TC	rs6967028	G	DE								0.1196	0.1175	0.3089	+-++	24.2	3.958	0.2661				0.0159217	0.17853	0.928937	-0.163379	0.300361	0.586482	0.107242	0.266043	0.686875							0.535549	0.251716	0.0333712
AD	TC	rs6967028	G	TOTAL								0.114	0.117	0.3299	+-++	25.5	4.027	0.2586				0.0140362	0.178624	0.937367	-0.170726	0.292408	0.559312	0.102858	0.265344	0.698283							0.531616	0.2512	0.0343188
AD	TC	rs11760752	A	IE								-0.0002	0.0022	0.9219	---+	0	0.305	0.959				-0.000364699	0.00265326	0.890673	-0.000167686	0.0112678	0.988126	-0.00340271	0.00780547	0.662881							0.00164158	0.0050438	0.74483
AD	TC	rs11760752	A	DE								0.037	0.0871	0.6715	+--+	0	1.478	0.6873				0.12789	0.129397	0.322979	-0.0675084	0.196946	0.731767	-0.126991	0.204734	0.535079							0.0895263	0.211674	0.672335
AD	TC	rs11760752	A	TOTAL								0.0375	0.0872	0.6667	+--+	0	1.502	0.6817				0.127525	0.128583	0.32131	-0.0676761	0.199451	0.734375	-0.130394	0.205109	0.524953							0.0911679	0.211969	0.667123
CHD	NO	rs1051921	A	rs1051921_A	-0.0318	0.0416	0.444	--+++++	11.7	6.793	0.3404	0.017	0.0567	0.7643	-+++	0	2.902	0.4069	-0.116868	0.0642855	0.0690711	-0.0316945	0.0642532	0.621819	0.147678	0.279052	0.596657	0.251128	0.179486	0.161768	0.0497901	0.262553	0.849593	0.282083	0.273659	0.302642	0.147231	0.209323	0.481825
CHD	NO	rs17145750	A	rs17145750_A	0.0047	0.0435	0.9131	--+++++	27.1	8.229	0.2218	0.0575	0.0591	0.3299	-+++	41.1	5.089	0.1654	-0.0805574	0.0677236	0.234242	-0.00963034	0.0674312	0.886434	0.247746	0.285613	0.385712	0.38936	0.184352	0.0346828	0.0233048	0.273136	0.932005	0.249195	0.280272	0.373938	0.188654	0.211675	0.372799
CHD	NO	rs6967028	G	rs6967028_G	0.0229	0.0518	0.6583	-+-+---	4.2	6.262	0.3945	0.0895	0.0712	0.2085	+-+-	0.7	3.021	0.3884	-0.0288215	0.0782343	0.712575	0.0763744	0.0791781	0.33475	-0.182678	0.420491	0.663969	0.400794	0.221751	0.0706991	-0.453676	0.383153	0.23639	-0.226536	0.40762	0.57838	-0.141116	0.297286	0.635014
CHD	NO	rs11760752	A	rs11760752_A	0.0496	0.0412	0.2279	+-+-+--	6	6.384	0.3816	-0.0283	0.0574	0.6221	-+--	0	1.034	0.7931	0.139107	0.0625513	0.0261563	-0.0046973	0.0645643	0.942002	0.0717897	0.309372	0.816499	-0.163089	0.163919	0.319764	0.270074	0.24656	0.273354	-0.192168	0.298423	0.51961	-0.10878	0.227556	0.632626
CHD	TG	rs1051921	A	IE	-0.0291	0.0051	1.131e-08	-------	0	5.703	0.4572	-0.0247	0.0062	7.3e-05	----	10.4	3.348	0.3411	-0.0376544	0.0104339	0.000307552	-0.0328389	0.00872453	0.000167234	-0.000517476	0.0154566	0.973292	-0.0250906	0.0140165	0.0734429	-0.0554545	0.0245818	0.0240759	-0.0194914	0.0282302	0.489914	-0.0245384	0.0160319	0.125868
CHD	TG	rs1051921	A	DE	0.0045	0.0403	0.9116	-++++++	8.3	6.541	0.3654	0.0541	0.0555	0.33	++++	0	2.952	0.3991	-0.0738239	0.0612807	0.228325	0.00517857	0.0629267	0.934412	0.142645	0.31225	0.647795	0.276303	0.160012	0.0842088	0.102223	0.283311	0.718238	0.300513	0.291294	0.302238	0.176019	0.208863	0.399368
CHD	TG	rs1051921	A	TOTAL	-0.0315	0.0398	0.4288	--+++++	16.1	7.15	0.3072	0.021	0.055	0.7027	-+++	4	3.125	0.3727	-0.111478	0.0597942	0.0622701	-0.0276603	0.0623434	0.657276	0.142127	0.308442	0.644949	0.251213	0.163655	0.12478	0.0467684	0.282622	0.868566	0.281021	0.282326	0.319552	0.151481	0.210694	0.472165
CHD	TG	rs17145750	A	IE	-0.0309	0.0053	6.459e-09	--+----	0	5.318	0.5038	-0.0287	0.0064	8.325e-06	-+--	6.3	3.2	0.3617	-0.0356648	0.0109073	0.00107616	-0.0373198	0.00932767	6.30822e-05	0.000195057	0.0186162	0.99164	-0.0268828	0.0136138	0.0483043	-0.0586123	0.0246606	0.0174653	-0.016398	0.0235543	0.486316	-0.0248609	0.0164783	0.131373
CHD	TG	rs17145750	A	DE	0.0459	0.0452	0.3091	-++++++	15.9	7.136	0.3085	0.1007	0.062	0.1045	++++	31.7	4.394	0.222	-0.0371314	0.0697818	0.594652	0.0328899	0.0707452	0.641999	0.234146	0.303715	0.440743	0.414548	0.181141	0.0221065	0.0768987	0.290022	0.790896	0.264348	0.295305	0.370697	0.217005	0.220579	0.325215
CHD	TG	rs17145750	A	TOTAL	0.0105	0.0452	0.8168	--+++++	21.9	7.686	0.262	0.0687	0.0627	0.2726	-+++	36.6	4.734	0.1924	-0.0727962	0.0690215	0.291567	-0.0044299	0.0717493	0.950769	0.234341	0.30788	0.446571	0.387665	0.180996	0.0322058	0.0182864	0.297248	0.950946	0.24795	0.297848	0.405143	0.192144	0.220451	0.383428
CHD	TG	rs6967028	G	IE	0.0035	0.0057	0.5391	+-+++--	5.1	6.324	0.3879	-0.0012	0.0068	0.8652	-++-	18.6	3.688	0.2972	0.0181494	0.0121394	0.134893	-4.48381e-05	0.00923834	0.996127	0.00102985	0.0341692	0.975956	0.0217621	0.0167633	0.19422	0.0406883	0.0459476	0.375867	-0.00563779	0.0197294	0.775065	-0.0195925	0.0141616	0.166512
CHD	TG	rs6967028	G	DE	0.022	0.0535	0.6815	-+-+---	6.3	6.406	0.3793	0.0976	0.0725	0.1784	+-+-	0	2.83	0.4185	-0.0462578	0.0819674	0.57252	0.0765058	0.0810883	0.345432	-0.208344	0.461396	0.651592	0.381869	0.207466	0.0656751	-0.496603	0.41633	0.232943	-0.222399	0.472117	0.637593	-0.115362	0.321455	0.719689
CHD	TG	rs6967028	G	TOTAL	0.0321	0.054	0.5515	-+-+---	4.1	6.254	0.3954	0.0987	0.0726	0.1743	+-+-	5.4	3.172	0.3658	-0.0281084	0.0836414	0.736827	0.076461	0.0809633	0.34497	-0.207314	0.473884	0.661764	0.403631	0.207915	0.0522191	-0.455915	0.410258	0.266444	-0.228037	0.471938	0.62896	-0.134954	0.322576	0.675681
CHD	TG	rs11760752	A	IE	0.0028	0.0044	0.5215	++-+-++	0	0.73	0.9938	0.0039	0.0057	0.4973	+-++	0	0.466	0.9263	0.00197128	0.00813404	0.808509	0.00170158	0.00774147	0.826027	-6.3307e-05	0.0200882	0.997486	0.00166844	0.0130226	0.898055	-0.00809818	0.024865	0.744662	0.00774388	0.0210621	0.713121	0.010741	0.0121947	0.378429
CHD	TG	rs11760752	A	DE	0.0458	0.0418	0.2727	+-+-+--	1.7	6.106	0.4114	-0.0302	0.0568	0.5953	-+--	0	1.041	0.7913	0.137096	0.0640637	0.0323555	-0.00653695	0.0644733	0.919241	0.0744429	0.323494	0.817997	-0.163941	0.167764	0.328464	0.277682	0.269345	0.302563	-0.196599	0.336832	0.559441	-0.120489	0.217199	0.579073
CHD	TG	rs11760752	A	TOTAL	0.0491	0.0418	0.2398	+-+-+--	0.7	6.041	0.4186	-0.0291	0.058	0.616	-+--	0	1.017	0.7971	0.139067	0.0633359	0.0281129	-0.00483538	0.0655235	0.941173	0.0743796	0.320174	0.816297	-0.162272	0.165891	0.327983	0.269583	0.267798	0.314095	-0.188856	0.336158	0.574248	-0.109748	0.216735	0.612597
CHD	HDLC	rs1051921	A	IE	-0.0131	0.0046	0.004085	-------	0	4.522	0.6064	-0.0103	0.006	0.08878	----	0	0.365	0.9473	-0.0290736	0.00967916	0.00266687	-0.012819	0.00771077	0.0964156	-0.00722022	0.0299683	0.80961	-0.0121406	0.0195201	0.533972	-0.0147627	0.0253597	0.560478	-0.000444612	0.0112617	0.968508	-0.0050781	0.0114725	0.65803
CHD	HDLC	rs1051921	A	DE	-0.0158	0.0416	0.7037	--+++++	0	5.805	0.4454	0.0307	0.0576	0.5935	-+++	0	2.809	0.422	-0.0877592	0.0630823	0.16417	-0.0184934	0.0646579	0.774863	0.155462	0.321193	0.628376	0.263456	0.175437	0.133171	0.0660252	0.291777	0.820978	0.283864	0.305654	0.353041	0.153139	0.210522	0.466964
CHD	HDLC	rs1051921	A	TOTAL	-0.0351	0.0419	0.4021	--+++++	8.9	6.586	0.3608	0.0194	0.0583	0.7389	-+++	0	2.843	0.4165	-0.116833	0.0631672	0.064374	-0.0313124	0.0658072	0.634202	0.148241	0.324914	0.648211	0.251316	0.175919	0.153124	0.0512625	0.288847	0.859137	0.283419	0.304467	0.351921	0.148061	0.210666	0.482164
CHD	HDLC	rs17145750	A	IE	-0.0158	0.0048	0.001032	--+----	0	5.731	0.454	-0.0142	0.0061	0.02063	-+--	0	2.07	0.558	-0.0295929	0.0102351	0.0038364	-0.0211467	0.00839341	0.0117543	0.00915423	0.0299508	0.759877	-0.00111704	0.0193684	0.954009	-0.0279142	0.0255538	0.274669	-0.000770308	0.0117491	0.947726	-0.00843944	0.0119533	0.480165
CHD	HDLC	rs17145750	A	DE	0.0262	0.0441	0.552	-++++++	17.3	7.252	0.2982	0.0791	0.0606	0.1917	++++	35.2	4.627	0.2012	-0.0512788	0.0672241	0.44558	0.012088	0.0693696	0.861665	0.241224	0.330099	0.464925	0.390537	0.176198	0.0266594	0.0539482	0.303327	0.858837	0.250429	0.303971	0.410021	0.198004	0.216507	0.360434
CHD	HDLC	rs17145750	A	TOTAL	0.002	0.0441	0.9637	--+++++	25.8	8.09	0.2316	0.0613	0.0615	0.3187	-+++	39.1	4.925	0.1774	-0.0808717	0.0666401	0.224916	-0.00905863	0.0697405	0.896653	0.250378	0.333834	0.453251	0.38942	0.181938	0.0323229	0.026034	0.293307	0.929273	0.249659	0.302875	0.409772	0.189565	0.215858	0.379839
CHD	HDLC	rs6967028	G	IE	0.0187	0.0056	0.0008578	+++++++	16.9	7.216	0.3013	0.0176	0.0077	0.02154	++++	39	4.921	0.1776	0.0293907	0.0102011	0.00396259	0.0127697	0.00959196	0.183093	0.00781119	0.0473772	0.869045	0.0626905	0.0223025	0.00494001	0.00233913	0.0286702	0.934975	0.000466101	0.018303	0.979683	0.00842654	0.0149147	0.572086
CHD	HDLC	rs6967028	G	DE	0.0046	0.0511	0.9281	-+-+---	1.5	6.091	0.4131	0.0805	0.0708	0.2553	+-+-	0	2.627	0.4528	-0.0594051	0.0755647	0.43178	0.0631794	0.0794258	0.426351	-0.189478	0.432829	0.661555	0.343127	0.201569	0.0887034	-0.455057	0.396781	0.251434	-0.239775	0.496908	0.629426	-0.148692	0.324032	0.646319
CHD	HDLC	rs6967028	G	TOTAL	0.0279	0.0517	0.5896	-+-+---	10.6	6.708	0.3487	0.0994	0.0714	0.1642	+-+-	11.2	3.38	0.3367	-0.0300144	0.0770212	0.696766	0.0759491	0.0800496	0.342735	-0.181667	0.421723	0.666633	0.405818	0.20241	0.0449703	-0.452718	0.394442	0.251075	-0.239309	0.49152	0.626346	-0.140266	0.324118	0.665188
CHD	HDLC	rs11760752	A	IE	-0.0054	0.0046	0.2395	--+--+-	0	1.006	0.9854	-0.0074	0.0061	0.2235	-+--	0	0.448	0.9301	-0.00177185	0.00884358	0.841204	-0.00990624	0.00771199	0.198958	0.00996797	0.0341845	0.770598	-0.00323019	0.0174192	0.852885	-0.0129858	0.0224282	0.562592	0.00091222	0.0156128	0.953408	-0.00568712	0.0115849	0.623492
CHD	HDLC	rs11760752	A	DE	0.0613	0.0413	0.1383	+++-+--	0	5.864	0.4386	-0.018	0.0587	0.7589	++--	0	0.948	0.8139	0.140916	0.0606075	0.0200692	0.00503893	0.0663703	0.939482	0.0618696	0.32133	0.847318	-0.160155	0.180637	0.375289	0.282242	0.249596	0.258142	-0.185115	0.322643	0.566141	-0.104105	0.223055	0.640697
CHD	HDLC	rs11760752	A	TOTAL	0.055	0.0417	0.1877	+-+-+--	0	5.965	0.4271	-0.0269	0.0594	0.6502	-+--	0	0.906	0.824	0.139144	0.0615708	0.0238275	-0.00486732	0.0667857	0.941902	0.0718376	0.32339	0.824205	-0.163385	0.180801	0.366168	0.269256	0.251149	0.283675	-0.184202	0.321544	0.566733	-0.109792	0.221931	0.620801
CHD	LDLC	rs1051921	A	IE	0.0025	0.003	0.3916	-+-+-++	20.7	7.566	0.2716	0.0051	0.0037	0.1587	+-++	20.8	3.79	0.285	-0.012361	0.00884221	0.162127	0.00433279	0.00355359	0.222741	-0.0125726	0.0295474	0.670466	0.0375573	0.0184539	0.0418309	-0.0070118	0.0127488	0.582321	0.00564869	0.0168417	0.737324	0.00385499	0.0110734	0.727741
CHD	LDLC	rs1051921	A	DE	-0.0314	0.0417	0.4511	--+++++	0	5.471	0.485	0.0077	0.0564	0.8913	-+++	0	2.523	0.4712	-0.103811	0.0650551	0.110546	-0.0361813	0.063011	0.565829	0.153126	0.315571	0.627511	0.220559	0.17592	0.209935	0.0577709	0.262497	0.825807	0.279867	0.294588	0.342098	0.14307	0.225039	0.524934
CHD	LDLC	rs1051921	A	TOTAL	-0.0317	0.0416	0.4461	--+++++	11.1	6.747	0.3448	0.0161	0.0562	0.7741	-+++	2.7	3.082	0.3792	-0.116172	0.0649984	0.0738877	-0.0318485	0.0631063	0.613784	0.140553	0.319228	0.659727	0.258116	0.170665	0.130428	0.0507591	0.262435	0.846633	0.285515	0.296718	0.335927	0.146925	0.222946	0.509884
CHD	LDLC	rs17145750	A	IE	0.0035	0.003	0.2413	-+-+-++	0	5.219	0.516	0.0047	0.0037	0.1948	+-++	11.5	3.39	0.3353	-0.00166598	0.0094944	0.860711	0.00436037	0.00352199	0.2157	-0.00720132	0.0275882	0.79407	0.0378838	0.0187207	0.0430081	-0.0129344	0.0144817	0.371775	0.00394772	0.0161434	0.806812	0.000996889	0.0110801	0.92831
CHD	LDLC	rs17145750	A	DE	-0.0024	0.0431	0.9564	--+++++	15.6	7.112	0.3106	0.0461	0.0589	0.4336	-+++	32.6	4.449	0.2169	-0.0787764	0.0668145	0.238386	-0.0136416	0.0655169	0.835061	0.247832	0.330582	0.453445	0.357723	0.18498	0.053132	0.0358075	0.286311	0.900472	0.249418	0.308112	0.418226	0.187917	0.223232	0.399898
CHD	LDLC	rs17145750	A	TOTAL	0.0015	0.0437	0.9724	--+++++	24.1	7.905	0.2451	0.0551	0.0597	0.356	-+++	39.7	4.974	0.1737	-0.0804424	0.0677977	0.235422	-0.00928126	0.0665495	0.889083	0.240631	0.335566	0.473318	0.395607	0.184822	0.032316	0.0228731	0.286223	0.936306	0.253366	0.309933	0.413651	0.188914	0.224385	0.399834
CHD	LDLC	rs6967028	G	IE	-0.0041	0.0032	0.2027	+-++-+-	0	2.09	0.9112	-0.0048	0.0037	0.1998	-++-	0	0.653	0.8841	0.00328759	0.0106784	0.758179	-0.00483582	0.00370259	0.191531	0.0338115	0.0582523	0.561623	0.00239956	0.0176313	0.891745	-0.0194215	0.0184977	0.293747	0.00733803	0.0229407	0.749067	-0.00774816	0.0130529	0.552783
CHD	LDLC	rs6967028	G	DE	0.0286	0.0524	0.5846	-+-+---	7	6.451	0.3746	0.1049	0.0732	0.1519	+-+-	1	3.03	0.387	-0.0320115	0.0776251	0.680057	0.0816863	0.0816065	0.316837	-0.173963	0.45438	0.701826	0.398269	0.20544	0.0525479	-0.446238	0.401546	0.266439	-0.247758	0.475438	0.602286	-0.134046	0.328116	0.682882
CHD	LDLC	rs6967028	G	TOTAL	0.0301	0.0527	0.5677	-+-+---	6.3	6.406	0.3793	0.1011	0.0725	0.1629	+-+-	2.2	3.068	0.3812	-0.0287239	0.0795618	0.71808	0.0768505	0.0808741	0.341986	-0.140151	0.450363	0.755652	0.400669	0.204695	0.0503013	-0.46566	0.404704	0.24989	-0.24042	0.471735	0.610296	-0.141794	0.327427	0.664974
CHD	LDLC	rs11760752	A	IE	-0.0022	0.0026	0.4099	+---+-+	0	1.982	0.9214	-0.003	0.0028	0.2765	---+	0	0.585	0.8999	0.00682691	0.00894634	0.445407	-0.00316856	0.00307832	0.303331	-0.00310604	0.0211416	0.883198	-0.0113937	0.0126084	0.366175	0.00231712	0.0142173	0.870535	-0.00734664	0.0222148	0.740864	0.00223387	0.0105511	0.832326
CHD	LDLC	rs11760752	A	DE	0.0529	0.0422	0.2099	+-+-+--	0	5.478	0.4841	-0.0245	0.0602	0.6832	-+--	0	0.862	0.8346	0.132386	0.061923	0.0325231	-0.00219991	0.0681755	0.974258	0.0746797	0.337698	0.82498	-0.153367	0.179035	0.391649	0.26861	0.258943	0.29958	-0.187396	0.307469	0.542206	-0.111184	0.223104	0.618236
CHD	LDLC	rs11760752	A	TOTAL	0.053	0.0426	0.2132	+-+-+--	0	5.986	0.4248	-0.0286	0.0608	0.6381	-+--	0	0.914	0.8221	0.139213	0.0629251	0.0269413	-0.00536847	0.0685326	0.937562	0.0715737	0.335399	0.831016	-0.164761	0.179606	0.358962	0.270927	0.259057	0.295644	-0.194743	0.304013	0.521799	-0.10895	0.220718	0.621576
CHD	TC	rs1051921	A	IE	-0.0013	0.0027	0.6228	-+-+-+-	19.5	7.45	0.2812	0.0014	0.0027	0.6159	+-+-	0	1.703	0.6363	-0.0173492	0.00793651	0.0288159	0.000850935	0.00329316	0.796102	-0.0173237	0.0326538	0.595747	0.0150976	0.0119532	0.206569	-0.0132011	0.0135316	0.329275	0.00128713	0.0138496	0.925955	-0.000820772	0.00835223	0.921718
CHD	TC	rs1051921	A	DE	-0.0228	0.0429	0.5951	--+++++	0	5.953	0.4285	0.0199	0.0587	0.734	-+++	0	2.828	0.4188	-0.0982423	0.0658857	0.135935	-0.032799	0.0672016	0.625501	0.14929	0.31371	0.634155	0.240158	0.171236	0.160768	0.0622506	0.283084	0.825948	0.286015	0.283083	0.312324	0.14842	0.207628	0.47471
CHD	TC	rs1051921	A	TOTAL	-0.0269	0.0436	0.5371	--+++++	9.7	6.643	0.3551	0.0228	0.0594	0.7008	-+++	0	2.956	0.3985	-0.115591	0.0683967	0.0910252	-0.031948	0.0675121	0.636057	0.131966	0.313284	0.673583	0.255255	0.172091	0.138006	0.0490495	0.283737	0.862754	0.287302	0.282578	0.309287	0.147599	0.208217	0.478403
CHD	TC	rs17145750	A	IE	0.0003	0.0028	0.917	-+-+---	0	3.503	0.7435	0.0014	0.0027	0.6161	+-+-	0	1.417	0.7016	-0.00697208	0.0088667	0.431679	0.00147712	0.0034249	0.666258	-0.00999895	0.0298945	0.738021	0.0127642	0.0109292	0.242845	-0.0163281	0.0149511	0.274787	-7.74643e-06	0.0135829	0.999545	-0.00185321	0.00911037	0.838809
CHD	TC	rs17145750	A	DE	0.004	0.0453	0.9294	--+++++	19.1	7.414	0.2842	0.0626	0.0643	0.3306	-+++	33.4	4.505	0.2119	-0.0728707	0.0665379	0.27344	-0.0112523	0.0743163	0.879652	0.239944	0.313152	0.443544	0.379483	0.186943	0.0423623	0.0349657	0.304448	0.908564	0.253757	0.293783	0.38772	0.191157	0.223351	0.392076
CHD	TC	rs17145750	A	TOTAL	0.0008	0.0453	0.9852	--+++++	24.4	7.938	0.2427	0.0662	0.065	0.3086	-+++	36.1	4.693	0.1957	-0.0798427	0.0658433	0.225276	-0.00977513	0.0752741	0.896677	0.229945	0.322318	0.475591	0.392247	0.185413	0.0343851	0.0186375	0.303247	0.950993	0.25375	0.293947	0.388	0.189304	0.223526	0.397051
CHD	TC	rs6967028	G	IE	-0.0061	0.0033	0.06608	+-+--+-	0	1.833	0.9344	-0.0071	0.0035	0.04317	-+--	0	1.112	0.7741	0.000425978	0.0102732	0.966925	-0.00697464	0.00422181	0.0985244	0.0602254	0.0678394	0.374668	-0.00551865	0.0101152	0.585355	-0.0104273	0.0172876	0.546396	0.00113937	0.0184884	0.95086	-0.0111608	0.0110184	0.311097
CHD	TC	rs6967028	G	DE	0.0281	0.0528	0.5945	-+-+---	10	6.665	0.353	0.1086	0.0758	0.1521	+-+-	10.3	3.345	0.3414	-0.0292579	0.0758191	0.699578	0.0831158	0.0860854	0.334293	-0.225407	0.480959	0.639312	0.409749	0.203307	0.043861	-0.44557	0.410698	0.277962	-0.231186	0.470214	0.62296	-0.127796	0.312916	0.682978
CHD	TC	rs6967028	G	TOTAL	0.0252	0.0528	0.6335	-+-+---	6.1	6.39	0.381	0.1029	0.0759	0.1752	+-+-	5.6	3.178	0.365	-0.0288319	0.0754021	0.702183	0.0761411	0.0863141	0.377701	-0.165182	0.479991	0.730745	0.40423	0.203949	0.0474779	-0.455997	0.415439	0.272367	-0.230046	0.463869	0.619944	-0.138957	0.314553	0.658664
CHD	TC	rs11760752	A	IE	-0.0005	0.0026	0.8556	+-+-+-+	0	2.216	0.8988	-0.0015	0.0027	0.5832	-+-+	0	0.858	0.8355	0.0073483	0.00865428	0.395829	-0.00163758	0.00326625	0.616115	0.00354449	0.0281354	0.899748	-0.00414867	0.00772144	0.591066	0.00291149	0.0137017	0.831724	-0.014519	0.0200617	0.469237	0.0056376	0.00887266	0.525175
CHD	TC	rs11760752	A	DE	0.0526	0.0411	0.2008	+-+-+--	0	5.561	0.4741	-0.0257	0.0579	0.6568	-+--	0	0.921	0.8204	0.131935	0.0603677	0.0288504	-0.00359812	0.065455	0.956162	0.0724756	0.330618	0.826485	-0.159414	0.179056	0.373304	0.268226	0.262205	0.306326	-0.177966	0.353254	0.614407	-0.114825	0.218122	0.598593
CHD	TC	rs11760752	A	TOTAL	0.0531	0.0417	0.2034	+-+-+--	0	5.876	0.4372	-0.0261	0.0581	0.6536	-+--	0	0.916	0.8216	0.139283	0.0622751	0.0253136	-0.0052357	0.0654165	0.936208	0.0760201	0.334639	0.820291	-0.163562	0.182044	0.36893	0.271138	0.26237	0.301409	-0.192485	0.345621	0.577578	-0.109188	0.218997	0.618075
Abbreviation	Meaning
ARIC	= the Atherosclerosis Risk in Communities study
CHS	= Cardiovascular Health Study
FHS_C1	= Framingham Heart Study parental cohorts
FHS_C2	= Framingham Heart Study offspring cohorts
MESA	= Multi-Ethnic Study of Atherosclerosis
WHI	= Women’s Health Initiative
LLFS	= Long Life Family Study
UKB	= UK Biobank
META	= results of meta-analysis of US-based cohorts
CHD sample = ARIC+CHS+FHS_C1+FHS_C2+MESA+WHI+LLFS
AD sample = CHS+FHS_C1+FHS_C2+LLFS
SNP	= single nucleotide polymorphism
EA	= effect allele
NO	= basic adjustment, i.e. models without mediators
AD	= Alzheimer's disease
CHD	= coronary heart disease
HDL-C	= high-density lipoprotein cholesterol
LDL-C	= low-density lipoprotein cholesterol
TC	= total cholesterol
TG	= triglycerides
BETA	= effect size
SE	= standard error
P	= p-value
Direction	= visualization of sign-directions in selected cohorts referring to positive-sign direction (+), negative-sign direction (-), and not available value (?) of the effect size.
IE	= indirect (mediation) effect
DE	= direct effect
TOTAL	= total effect

## Sheet: Notes
Abbreviation	Meaning
ARIC	= the Atherosclerosis Risk in Communities study
CHS	= Cardiovascular Health Study
FHS_C1	= Framingham Heart Study parental cohorts
FHS_C2	= Framingham Heart Study offspring cohorts
MESA	= Multi-Ethnic Study of Atherosclerosis
WHI	= Women’s Health Initiative
LLFS	= Long Life Family Study
UKB	= UK Biobank
META	= results of meta-analysis of US-based cohorts
CHD sample	= ARIC+CHS+FHS_C1+FHS_C2+MESA+WHI+LLFS
AD sample	= CHS+FHS_C1+FHS_C2+LLFS
SNP	= single nucleotide polymorphism
EA	= effect allele
NO	= basic adjustment, i.e. models without mediators
AD	= Alzheimer's disease
CHD	= coronary heart disease
HDL-C	= high-density lipoprotein cholesterol
LDL-C	= low-density lipoprotein cholesterol
TC	= total cholesterol
TG	= triglycerides
BETA	= effect size
SE	= standard error
P	= p-value
Direction	= visualization of sign-directions in selected cohorts referring to positive-sign direction (+), negative-sign direction (-), and not available value (?) of the effect size.
IE	= indirect (mediation) effect
DE	= direct effect
TOTAL	= total effect
