# Supplementary material for: Exogenous exposures shape genetic predisposition to lipids, Alzheimer’s, and coronary heart disease in the MLXIPL gene locus
Source: Aging (Albany NY). 2023 Apr 18;15(9):3249–72. doi: 10.18632/aging.204665 (PMC10449285; doi:10.18632/aging.204665)
Supplement: Supplementary Table 6B [file aging-15-204665-s012.xlsx]

## Sheet: Supplementary Table 6B
Supplementary Table 6B. Univariate unconditional and mediation analysis of the associations of the SNPs from the MLXIPL gene locus with AD and CHD in the UK biobank.
					UKB
OUTCOME	MEDIATOR	SNP	EA	CoefName	BETA	SE	P
AD	NO	rs1051921	A	rs1051921_A	0.114459	0.0737805	0.12082
AD	NO	rs17145750	T	rs17145750_T	0.175986	0.076055	0.0206711
AD	NO	rs6967028	C	rs6967028_C	-0.103879	0.100323	0.30046
AD	NO	rs11760752	A	rs11760752_A	-0.000133094	0.0760572	0.998604
AD	TG	rs1051921	A	DE	0.100488	0.0718035	0.161668
AD	TG	rs1051921	A	IE	0.0137593	0.00374114	0.00023523
AD	TG	rs1051921	A	TOTAL	0.114247	0.0717502	0.11132
AD	TG	rs17145750	T	DE	0.16097	0.0724395	0.0262743
AD	TG	rs17145750	T	IE	0.0146766	0.00393299	0.000190216
AD	TG	rs17145750	T	TOTAL	0.175647	0.0739299	0.0175082
AD	TG	rs6967028	C	DE	-0.103828	0.109903	0.3448
AD	TG	rs6967028	C	IE	-0.000303843	0.000781112	0.697285
AD	TG	rs6967028	C	TOTAL	-0.104132	0.109657	0.342309
AD	TG	rs11760752	A	DE	0.00380922	0.0805058	0.962261
AD	TG	rs11760752	A	IE	-0.00347131	0.00114387	0.00240777
AD	TG	rs11760752	A	TOTAL	0.000337909	0.0808274	0.996664
AD	HDLC	rs1051921	A	DE	0.108839	0.0734503	0.138392
AD	HDLC	rs1051921	A	IE	0.00175712	0.00153929	0.253656
AD	HDLC	rs1051921	A	TOTAL	0.110596	0.0733885	0.131811
AD	HDLC	rs17145750	T	DE	0.169594	0.0768039	0.0272341
AD	HDLC	rs17145750	T	IE	0.0017718	0.00149374	0.235563
AD	HDLC	rs17145750	T	TOTAL	0.171366	0.0765392	0.0251604
AD	HDLC	rs6967028	C	DE	-0.102295	0.0997774	0.305256
AD	HDLC	rs6967028	C	IE	-0.000328954	0.000469503	0.483526
AD	HDLC	rs6967028	C	TOTAL	-0.102624	0.0995938	0.302812
AD	HDLC	rs11760752	A	DE	0.0026551	0.0773995	0.972635
AD	HDLC	rs11760752	A	IE	-0.000530532	0.0005374	0.323535
AD	HDLC	rs11760752	A	TOTAL	0.00212457	0.0773223	0.978079
AD	LDLC	rs1051921	A	DE	0.110658	0.0740408	0.135029
AD	LDLC	rs1051921	A	IE	-6.52575e-05	0.00037371	0.861378
AD	LDLC	rs1051921	A	TOTAL	0.110593	0.0738753	0.134387
AD	LDLC	rs17145750	T	DE	0.171746	0.0757184	0.0233156
AD	LDLC	rs17145750	T	IE	-3.97492e-05	0.000372474	0.915014
AD	LDLC	rs17145750	T	TOTAL	0.171707	0.0757006	0.0233151
AD	LDLC	rs6967028	C	DE	-0.102448	0.0953724	0.282736
AD	LDLC	rs6967028	C	IE	0.000245734	0.000461396	0.594319
AD	LDLC	rs6967028	C	TOTAL	-0.102203	0.0956174	0.285127
AD	LDLC	rs11760752	A	DE	0.00148741	0.0731098	0.983768
AD	LDLC	rs11760752	A	IE	0.000158269	0.000334666	0.636272
AD	LDLC	rs11760752	A	TOTAL	0.00164568	0.073287	0.982085
AD	TC	rs1051921	A	DE	0.11376	0.0724261	0.11625
AD	TC	rs1051921	A	IE	0.00030984	0.000389012	0.425753
AD	TC	rs1051921	A	TOTAL	0.11407	0.0723004	0.114629
AD	TC	rs17145750	T	DE	0.175379	0.0772916	0.0232646
AD	TC	rs17145750	T	IE	0.000419342	0.000430337	0.329833
AD	TC	rs17145750	T	TOTAL	0.175799	0.0774657	0.0232457
AD	TC	rs6967028	C	DE	-0.104158	0.100232	0.298726
AD	TC	rs6967028	C	IE	0.000344574	0.000465735	0.459391
AD	TC	rs6967028	C	TOTAL	-0.103814	0.100002	0.299217
AD	TC	rs11760752	A	DE	1.78693e-05	0.0742623	0.999808
AD	TC	rs11760752	A	IE	7.769e-05	0.000316165	0.805894
AD	TC	rs11760752	A	TOTAL	9.55593e-05	0.0742808	0.998974
CHD	NO	rs1051921	A	rs1051921_A	0.00667281	0.0173464	0.700474
CHD	NO	rs17145750	T	rs17145750_T	0.0112856	0.0181857	0.53488
CHD	NO	rs6967028	C	rs6967028_C	-0.0133969	0.0225074	0.551695
CHD	NO	rs11760752	A	rs11760752_A	0.0237373	0.017623	0.177997
CHD	TG	rs1051921	A	DE	0.0243548	0.0184155	0.185997
CHD	TG	rs1051921	A	IE	-0.0175642	0.00125411	1.44656e-44
CHD	TG	rs1051921	A	TOTAL	0.00679051	0.0178479	0.7036
CHD	TG	rs17145750	T	DE	0.0299871	0.0187776	0.110275
CHD	TG	rs17145750	T	IE	-0.0185659	0.00133458	5.39702e-44
CHD	TG	rs17145750	T	TOTAL	0.0114212	0.0188548	0.544684
CHD	TG	rs6967028	C	DE	-0.0138207	0.0228524	0.545325
CHD	TG	rs6967028	C	IE	0.000388959	0.000891281	0.662543
CHD	TG	rs6967028	C	TOTAL	-0.0134317	0.0225727	0.551816
CHD	TG	rs11760752	A	DE	0.019421	0.0173554	0.263132
CHD	TG	rs11760752	A	IE	0.00434454	0.000750741	7.16544e-09
CHD	TG	rs11760752	A	TOTAL	0.0237656	0.0173299	0.170263
CHD	HDLC	rs1051921	A	DE	0.0151936	0.017665	0.389734
CHD	HDLC	rs1051921	A	IE	-0.00976644	0.0011938	2.81587e-16
CHD	HDLC	rs1051921	A	TOTAL	0.0054272	0.0174591	0.755913
CHD	HDLC	rs17145750	T	DE	0.0196422	0.0183617	0.284736
CHD	HDLC	rs17145750	T	IE	-0.00976657	0.00128809	3.39675e-14
CHD	HDLC	rs17145750	T	TOTAL	0.00987567	0.018336	0.590167
CHD	HDLC	rs6967028	C	DE	-0.0154308	0.0207779	0.457691
CHD	HDLC	rs6967028	C	IE	0.00184015	0.00141483	0.19339
CHD	HDLC	rs6967028	C	TOTAL	-0.0135906	0.0211507	0.520509
CHD	HDLC	rs11760752	A	DE	0.0211367	0.0186923	0.258153
CHD	HDLC	rs11760752	A	IE	0.00284956	0.00120313	0.0178624
CHD	HDLC	rs11760752	A	TOTAL	0.0239863	0.0187068	0.199765
CHD	LDLC	rs1051921	A	DE	0.00614994	0.0183505	0.737522
CHD	LDLC	rs1051921	A	IE	-0.000182942	0.000727485	0.80145
CHD	LDLC	rs1051921	A	TOTAL	0.005967	0.0181191	0.741913
CHD	LDLC	rs17145750	T	DE	0.0105258	0.0184467	0.568265
CHD	LDLC	rs17145750	T	IE	-0.000109556	0.000800575	0.891152
CHD	LDLC	rs17145750	T	TOTAL	0.0104163	0.0185662	0.574774
CHD	LDLC	rs6967028	C	DE	-0.014515	0.0232434	0.532313
CHD	LDLC	rs6967028	C	IE	0.000700282	0.00102115	0.492853
CHD	LDLC	rs6967028	C	TOTAL	-0.0138147	0.0229579	0.547345
CHD	LDLC	rs11760752	A	DE	0.0234958	0.0175125	0.179706
CHD	LDLC	rs11760752	A	IE	0.000503018	0.000764287	0.510439
CHD	LDLC	rs11760752	A	TOTAL	0.0239988	0.0175176	0.170692
CHD	TC	rs1051921	A	DE	0.00427956	0.0174355	0.806107
CHD	TC	rs1051921	A	IE	0.0011376	0.000978965	0.245216
CHD	TC	rs1051921	A	TOTAL	0.00541716	0.0175762	0.757922
CHD	TC	rs17145750	T	DE	0.00832876	0.0184966	0.652504
CHD	TC	rs17145750	T	IE	0.00151485	0.000985337	0.124197
CHD	TC	rs17145750	T	TOTAL	0.00984362	0.0184612	0.593892
CHD	TC	rs6967028	C	DE	-0.0150254	0.023538	0.523248
CHD	TC	rs6967028	C	IE	0.00129317	0.00120078	0.281507
CHD	TC	rs6967028	C	TOTAL	-0.0137323	0.0233245	0.556031
CHD	TC	rs11760752	A	DE	0.0232362	0.0174289	0.182466
CHD	TC	rs11760752	A	IE	0.000324975	0.000942304	0.73019
CHD	TC	rs11760752	A	TOTAL	0.0235612	0.0175308	0.178953
Abbreviation	Meaning
ARIC	= the Atherosclerosis Risk in Communities study
CHS	= Cardiovascular Health Study
FHS_C1	= Framingham Heart Study parental cohorts
FHS_C2	= Framingham Heart Study offspring cohorts
MESA	= Multi-Ethnic Study of Atherosclerosis
WHI	= Women’s Health Initiative
LLFS	= Long Life Family Study
UKB	= UK Biobank
META	= results of meta-analysis of US-based cohorts
CHD sample = ARIC+CHS+FHS_C1+FHS_C2+MESA+WHI+LLFS
AD sample = CHS+FHS_C1+FHS_C2+LLFS
SNP	= single nucleotide polymorphism
EA	= effect allele
NO	= basic adjustment, i.e. models without mediators
AD	= Alzheimer's disease
CHD	= coronary heart disease
HDL-C	= high-density lipoprotein cholesterol
LDL-C	= low-density lipoprotein cholesterol
TC	= total cholesterol
TG	= triglycerides
BETA	= effect size
SE	= standard error
P	= p-value
Direction	= visualization of sign-directions in selected cohorts referring to positive-sign direction (+), negative-sign direction (-), and not available value (?) of the effect size.
IE	= indirect (mediation) effect
DE	= direct effect
TOTAL	= total effect

## Sheet: Notes
Abbreviation	Meaning
ARIC	= the Atherosclerosis Risk in Communities study
CHS	= Cardiovascular Health Study
FHS_C1	= Framingham Heart Study parental cohorts
FHS_C2	= Framingham Heart Study offspring cohorts
MESA	= Multi-Ethnic Study of Atherosclerosis
WHI	= Women’s Health Initiative
LLFS	= Long Life Family Study
UKB	= UK Biobank
META	= results of meta-analysis of US-based cohorts
CHD sample	= ARIC+CHS+FHS_C1+FHS_C2+MESA+WHI+LLFS
AD sample	= CHS+FHS_C1+FHS_C2+LLFS
SNP	= single nucleotide polymorphism
EA	= effect allele
NO	= basic adjustment, i.e. models without mediators
AD	= Alzheimer's disease
CHD	= coronary heart disease
HDL-C	= high-density lipoprotein cholesterol
LDL-C	= low-density lipoprotein cholesterol
TC	= total cholesterol
TG	= triglycerides
BETA	= effect size
SE	= standard error
P	= p-value
Direction	= visualization of sign-directions in selected cohorts referring to positive-sign direction (+), negative-sign direction (-), and not available value (?) of the effect size.
IE	= indirect (mediation) effect
DE	= direct effect
TOTAL	= total effect
